# Supplementary material for: Maternal Body Mass Index, Diabetes, and Gestational Weight Gain and Risk for Pediatric Cancer in Offspring: A Systematic Review and Meta-Analysis
Source: PubMed Central journal article supplement — JNCI Cancer Spectr. 2022 Feb 26;6(2):pkac020. doi: 10.1093/jncics/pkac020 (PMC8982388; doi:10.1093/jncics/pkac020), 2022-02-26
Supplement: pkac020_supplementary_data.pdf [file pkac020_supplementary_data.pdf]

## SUPPLEMENTARY MATERIALS

Maternal BMI, diabetes, and gestational weight gain and risk for pediatric cancer in offspring: A systematic review and meta-analysis

By Marley et al.

### Table of Contents for Supplementary Material

#### **Supplementary Methods**

**Supplementary Table 1.** Main characteristics of pre-pregnancy BMI studies included in the meta-analysis

**Supplementary Table 2.** Main characteristics of the diabetes studies included in the meta-analysis

**Supplementary Table 3.** Main characteristics of gestational weight gain studies included in the meta-analysis

**Supplementary Table 4.** Quality assessment of case-control/nested case-control studies in the meta-analysis according to the Newcastle-Ottawa scale (NOS)

**Supplementary Table 5.** Quality assessment of cohort/case-cohort studies in the meta-analysis according to the Newcastle-Ottawa scale (NOS)

**Supplementary Table 6.** Subgroup analyses for the associations with childhood cancer risk according to geographic region and study design

**Supplementary Figure 1.** Forest plot: meta-analysis of the association between any diabetes and risk of any cancer

**Supplementary Figure 2.** Forest plot: meta-analysis of the association between any diabetes and risk of (A) any leukemia and (B) acute lymphoblastic leukemia among studies controlling for birthweight

**Supplementary Figure 3.** Forest plot: meta-analysis of the association between (A) pregestational diabetes and (B) gestational diabetes and risk of any cancer

## **References**

## **Supplementary Methods**

### **Search Terms used in systematic literature search**

The following search terms were used: ([‘childhood cancer’, OR ‘childhood malignancy’, OR ‘pediatric cancer’, OR ‘child’, OR ‘pediatric’,] AND [‘acute lymphoblastic leukemia’ OR ‘acute myeloid leukemia’, OR ‘osteosarcoma’, OR ‘Ewing sarcoma’, OR ‘neuroblastoma’, OR ‘Wilms tumor’, OR ‘hepatoblastoma’, OR ‘rhabdomyosarcoma’, OR ‘retinoblastoma’, OR ‘germ cell tumor’, OR ‘ependymoma’, OR ‘medulloblastoma’, OR ‘astrocytoma’, OR ‘glioblastoma’, OR ‘glioma’, OR ‘central nervous system tumor’, OR ‘non-Hodgkin’s lymphoma’, OR ‘Hodgkin’s lymphoma’, OR ‘lymphoma’,] AND [‘pre-pregnancy BMI’, OR ‘prepregnancy BMI’, OR ‘prenatal BMI’, OR ‘prenatal obesity’, OR ‘maternal obesity’, OR ‘diabetes’, OR ‘maternal diabetes’, OR ‘gestational weight gain’, OR ‘pre-pregnancy characteristics’, OR ‘prepregnancy characteristics’, OR ‘perinatal characteristics’, OR ‘perinatal exposures’, OR ‘maternal characteristics’, OR ‘maternal exposures’].

Supplementary Table 1. Main characteristics of pre-pregnancy BMI studies included in the meta-analysis<sup>a</sup>

| Study                       | Design       | Study Period | Country   | Cancer(s)                                             | Cohort: sample (cases)<br>Case-control: controls /cases | Age range       | Ascertainment of BMI               | Number of mothers in (BMI) categories                                                                                        | Ascertainment of cancer diagnosis   | OR (95% CI)                                                                           | Adjusted covariates                                                                                                              |
|-----------------------------|--------------|--------------|-----------|-------------------------------------------------------|---------------------------------------------------------|-----------------|------------------------------------|------------------------------------------------------------------------------------------------------------------------------|-------------------------------------|---------------------------------------------------------------------------------------|----------------------------------------------------------------------------------------------------------------------------------|
| McLaughlin, et al. 2006 (1) | Case-cohort  | 1993-2001    | US (NY)   | Hepatoblastoma                                        | 1850/33                                                 | 1 month-5 years | Birth records                      | Cases: 3 (<20), 10 (20-24), 12 (25-29), 8 (30+)<br>Controls: 207 (<20), 895 (20-24), 447 (25-29), 301 (30+)                  | New York State Cancer registry      | <20: 1.4 (0.3-4.9), 20-24: referent, 25-29: 2.9 (1.2-7.6), 30+: 2.1 (0.7-6.1)         | birth year, birth weight                                                                                                         |
| Spector, et al. 2007 (2)    | case control | 1996-2002    | US        | Acute lymphoblastic leukemia & acute myeloid leukemia | 255/240                                                 | <1 year         | Self-report (interview)            | Cases: 132 (<25), 71 (25-29.9), 37 (30+)<br>Controls: 157 (<25), 53 (25-29.9), 45 (30+)                                      | Children's Oncology Group           | <25: referent, 25-29.9: 1.61 (1.04-2.48), 30+: 1.01 (0.61-1.68)                       | sex, race, maternal education                                                                                                    |
| Greenop, et al. 2014 (3)    | case control | 2005-2010    | Australia | All Childhood Brain Tumors                            | 1,079/319                                               | 0-14            | Self-report (questionnaire/survey) | Cases: 21 (<18.5), 202 (18.5-24.9), 59 (25-29.9), 31 (30+)<br>Controls: 41 (<18.5), 557 (18.5-24.9), 153 (25-29.9), 92 (30+) | National pediatric oncology centers | <18.5: 1.8 (0.7-2.1), 18.5-24.9: referent, 25-29.9: 1.1 (0.8-1.5), 30+: 0.9 (0.6-1.5) | Child's age at diagnosis or recruitment, child's sex, state of residence, child's year of birth, maternal age, child's ethnicity |
|                             |              |              |           | Low grade gliomas                                     | 1,079/51                                                |                 |                                    | Cases: 10 (<18.5), 94 (18.5-24.9), 26 (25-29.9), 20 (30+)<br>Controls: 41 (<18.5), 557                                       |                                     | <18.5: 1.2 (0.6-2.6), 18.5-24.9: referent, 25-29.9: 1.1 (0.8-1.8), 30+: 1.3 (0.8-2.3) | Child's age at diagnosis or recruitment, child's sex, state of residence, child's year of birth,                                 |

|                           |              |           |               |                             |                |               |                                   |                                                                                                                                                   |                                              |                                                                                                                                  |                                                                                                      |
|---------------------------|--------------|-----------|---------------|-----------------------------|----------------|---------------|-----------------------------------|---------------------------------------------------------------------------------------------------------------------------------------------------|----------------------------------------------|----------------------------------------------------------------------------------------------------------------------------------|------------------------------------------------------------------------------------------------------|
|                           |              |           |               |                             |                |               |                                   | (18.5-24.9), 153<br>(25-29.9), 92<br>(30+)                                                                                                        |                                              | maternal age, child's ethnicity                                                                                                  |                                                                                                      |
|                           |              |           |               |                             |                |               |                                   | Cases: 3 (<18.5),<br>47 (18.5-24.9),<br>19 (25-29.9), 4<br>(30+)<br>Controls: 41<br>(<18.5), 557<br>(18.5-24.9), 153<br>(25-29.9), 92<br>(30+)    |                                              | Child's age at diagnosis or recruitment, child's sex, state of residence, child's year of birth, maternal age, child's ethnicity |                                                                                                      |
|                           |              |           |               | Embryonal tumors            | 1,079/75       |               |                                   | Cases: 10<br>(<18.5), 101<br>(18.5-24.9), 45<br>(25-29.9), 28<br>(30+)<br>Controls: 5<br>(<18.5), 90<br>(18.5-24.9), 31<br>(25-29.9), 19<br>(30+) | Wills Eye Hospital/Children's Oncology Group | <18.5: 0.6 (0.8-2.0), 18.5-24.9: referent, 25-29.9: 1.4 (0.8-2.5), 30+: 0.5 (0.9-1.5)                                            | Child's age at interview, mother's race/ethnicity, mother's educational attainment, household income |
| Heck, et al. 2015 (4)     | case-control | 2006-2011 | US and Canada | Retinoblastoma (unilateral) | 136/165        | 0-14          | Self-Report (telephone interview) | Cases: 8 (<18.5), 50 (18.5-24.9), 20 (25-29.9), 17 (30+)<br>Controls: 5<br>(<18.5), 90<br>(18.5-24.9), 31<br>(25-29.9), 19<br>(30+)               |                                              | <18.5: 2.6 (0.7-9.4), 18.5-24.9: referent, 25-29.9: 1.2 (0.7-2.3), 30+: 1.1 (0.5-2.5)                                            | Child's age at interview, mother's race/ethnicity, mother's educational attainment, household income |
|                           |              |           |               | Retinoblastoma (bilateral)  | 136/87         | 0-14          |                                   | Cases: 0 (<18.4), 8 (18.5-24.9), 10 (25+)<br>Noncases: 35,632 (<18.4), 840,420 (18.5-24.9), 428,539 (25+)                                         | Swedish National Cancer Registry             | <18.5: 4.5 (1.0-20.1), normal: referent, 25-29.9: 1.2 (0.5-2.6), 30+: 1.0 (0.4-2.5)                                              | Child's age at interview, mother's race/ethnicity, mother's educational attainment, household income |
| Petridou, et al. 2015 (5) | case-control | 1973-2007 | Sweden        | Hodgkin Lymphoma            | 1,304,609 (18) | 28 days-14 yr | Swedish Medical Birth Registry    |                                                                                                                                                   | Swedish National Cancer Registry             | <18.4: 0.77 (0.24-2.44), 18.5-24.9: referent, 25+: 1.09 (0.76-1.57)                                                              | sex, maternal education, maternal age, gestational age, birth order                                  |

|                            |                             |           |         |                              |                 |    |                                                                                                                                        |                                                                                                            |                                                                                                  |                                                                                                |                                                                     |
|----------------------------|-----------------------------|-----------|---------|------------------------------|-----------------|----|----------------------------------------------------------------------------------------------------------------------------------------|------------------------------------------------------------------------------------------------------------|--------------------------------------------------------------------------------------------------|------------------------------------------------------------------------------------------------|---------------------------------------------------------------------|
| Contreras, et al. 2016 (6) | Registry based case control | 1988-2013 | US (CA) | Non-Hodgkin Lymphoma         | 1,304,609 (136) |    | Birth certificate                                                                                                                      | Cases: 3 (<18.4), 87 (18.5-24.9), 46 (25+)<br>Noncases: 35,629 (<18.4), 840,341 (18.5-24.9), 428,503 (25+) | California Cancer Registry (ICCC-3)                                                              | <18.4: 0.77 (0.24-2.44), 18.5-24.9: referent, 25+: 1.09 (0.76-1.57)                            | sex, maternal education, maternal age, gestational age, birth order |
|                            |                             |           |         | Overall                      | 270,147 /11,149 | <6 | N/A                                                                                                                                    | N/A                                                                                                        | N/A                                                                                              |                                                                                                |                                                                     |
|                            |                             |           |         | Acute lymphoblastic leukemia | 270,147 /4,101  |    | Cases: 5 (<18.5), 123 (18.5-24.9), 74 (25-29.9), 47 (30+)<br>Controls: 1,249 (<18.5), 18,484 (18.5-24.9), 9,352 (25-29.9), 6,758 (30+) |                                                                                                            | <18.5: 0.62 (0.25-1.52), 18.5-24.9: referent, 25-29.9: 1.17 (0.88-1.57), 30+: 1.03 (0.73-1.45)   | Year of birth, maternal/paternal race/ethnicity, maternal age                                  |                                                                     |
|                            |                             |           |         | Acute myeloid leukemia       | 270,147 /706    |    | Cases: 3 (<18.5), 57 (18.5-24.9), 34 (25-29.9), 23 (30+)<br>Controls: 1,249 (<18.5), 18,484 (18.5-24.9), 9,352 (25-29.9), 6,758 (30+)  |                                                                                                            | <18.5: insufficient cases, 18.5-24.9: referent, 25-29.9: 1.22 (0.80-1.88), 30+: 1.17 (0.71-1.91) | Year of birth, maternal/paternal race/ethnicity, maternal age                                  |                                                                     |
|                            |                             |           |         | Leukemia                     | 270,147 /5,034  |    |                                                                                                                                        |                                                                                                            |                                                                                                  | <18.5: 0.62 (0.31-1.27), 18.5-24.9: referent, 25-29.9: 1.27 (1.01-1.59), 30+: 1.13 (0.86-1.47) | Year of birth, maternal/paternal race/ethnicity, maternal age       |

|                  |               |                                                                                                                                        |                                                                                                  |                                                               |
|------------------|---------------|----------------------------------------------------------------------------------------------------------------------------------------|--------------------------------------------------------------------------------------------------|---------------------------------------------------------------|
| Astrocytoma      | 270,147/990   | Cases: 4 (<18.5), 51 (18.5-24.9), 30 (25-29.9), 20 (30+)<br>Controls: 1,249 (<18.5), 18,484 (18.5-29.9), 9,352 (25-29.9), 6,758 (30+)  | <18.5: insufficient cases, 18.5-24.9: referent, 25-29.9: 1.28 (0.81-2.03), 30+: 1.23 (0.73-2.09) | Year of birth, maternal/paternal race/ethnicity, maternal age |
| Embryonal tumor  | 270,147/709   | Cases: 4 (<18.5), 44 (18.5-24.9), 21 (25-29.9), 8 (30+)<br>Controls: 1,249 (<18.5), 18,484 (18.5-24.9), 9,352 (25-29.9), 6,758 (30+)   | <18.5: insufficient cases, 18.5-24.9: referent, 25-29.9: 0.91 (0.54-1.53), 30+: 0.47 (0.22-1.00) | Year of birth, maternal/paternal race/ethnicity, maternal age |
| Germ cell tumors | 270,147/445   | Cases: 5 (<18.5), 34 (18.5-24.9), 16 (25-29.9), 10 (30+)<br>Controls: 1,249 (<18.5), 18,484 (18.5-24.9), 9,352 (25-29.9), 6,758 (30+)  | <18.5: 2.14 (0.83-5.51), 18.5-24.9: referent, 25-29.9: 0.94 (0.52-1.72), 30+: 0.82 (0.40-1.68)   | Year of birth, maternal/paternal race/ethnicity, maternal age |
| Hepatoblastoma   | 270,147/337   | Cases: 3 (<18.5), 38 (18.5-24.9), 14 (25-29.9), 16 (30+)<br>Controls: 1,249 (<18.5), 18,484 (18.5-24.9), 9,352 (25-29.9), 6,758 (30+)  | <18.5: insufficient cases, 18.5-24.9: referent, 25-29.9: 0.71 (0.38-1.31), 30+: 1.10 (0.60-1.99) | Year of birth, maternal/paternal race/ethnicity, maternal age |
| Neuroblastoma    | 270,147/1,378 | Cases: 7 (<18.5), 112 (18.5-24.9), 55 (25-29.9), 43 (30+)<br>Controls: 1,249 (<18.5), 18,484 (18.5-24.9), 9,352 (25-29.9), 6,758 (30+) | <18.5: 0.90 (0.42-1.94), 18.5-24.9: referent, 25-29.9: 1.05 (0.76-1.45), 30+: 1.16 (0.81-1.66)   | Year of birth, maternal/paternal race/ethnicity, maternal age |

|                                  |              |           |         |                  |         |     |               |                                                                                                                                                        |                                                                                                  |                                                               |                               |
|----------------------------------|--------------|-----------|---------|------------------|---------|-----|---------------|--------------------------------------------------------------------------------------------------------------------------------------------------------|--------------------------------------------------------------------------------------------------|---------------------------------------------------------------|-------------------------------|
|                                  |              |           |         |                  |         |     |               | <p>Controls: 1,249 (&lt;18.5), 18,484 (18.5-24.9), 9,352 (25-29.9), 6,758 (30+)</p> <p>Cases: 2 (&lt;18.5), 52 (18.5-24.9), 40 (25-29.9), 19 (30+)</p> |                                                                                                  |                                                               |                               |
|                                  |              |           |         |                  |         |     |               | <p>Controls: 1,249 (&lt;18.5), 18,484 (18.5-24.9), 9,352 (25-29.9), 6,758 (30+)</p> <p>Cases: 2 (&lt;18.5), 27 (18.5-24.9), 13 (25-29.9), 11 (30+)</p> | <18.5: insufficient cases, 18.5-24.9: referent, 25-29.9: 1.40 (0.92-2.14), 30+: 0.88 (0.52-1.51) | Year of birth, maternal/paternal race/ethnicity, maternal age |                               |
|                                  |              |           |         |                  |         |     |               | <p>Controls: 1,249 (&lt;18.5), 18,484 (18.5-24.9), 9,352 (25-29.9), 6,758 (30+)</p> <p>Cases: 1 (&lt;18.5), 78 (18.5-24.9), 33 (25-29.9), 22 (30+)</p> | <18.5: insufficient cases, 18.5-24.9: referent, 25-29.9: 0.96 (0.49-1.88), 30+: 1.13 (0.55-2.30) | Year of birth, maternal/paternal race/ethnicity, maternal age |                               |
|                                  |              |           |         |                  |         |     |               | <p>Controls: 1,249 (&lt;18.5), 18,484 (18.5-24.9), 9,352 (25-29.9), 6,758 (30+)</p> <p>Cases: 4 (18.5-24.9), 7 (25+)</p>                               | <18.5: insufficient cases, 18.5-24.9: referent, 25-29.9: 0.85 (0.56-1.28), 30+: 0.79 (0.49-1.28) | Year of birth, maternal/paternal race/ethnicity, maternal age |                               |
| Peckham-Gregory, et al. 2016 (7) | case-control | 1995-2011 | US (TX) | Hodgkin Lymphoma | 1045/11 | <16 | Birth Records | <p>Controls: 553 (18.5-24.9), 492 (25+)</p> <p>Cases: 6 (18.5-24.9), 10 (25+)</p> <p>Controls: 553</p>                                                 | Texas Cancer Registry                                                                            | 18.5-24.9: referent, 25+: 1.97 (0.57-6.76)                    | univariate                    |
|                                  |              |           |         | Non Burkitt non- | 1045/16 |     |               | <p>Controls: 553</p>                                                                                                                                   |                                                                                                  | 18.5-24.9: referent, 25+: 1.44 (0.51-4.11)                    | sex, maternal race/ethnicity, |



|                            |                                          |                                      |        |                                       |               |     |                                         |                                                                                                                                                      |                                                           |                                                                                                 |                                                    |
|----------------------------|------------------------------------------|--------------------------------------|--------|---------------------------------------|---------------|-----|-----------------------------------------|------------------------------------------------------------------------------------------------------------------------------------------------------|-----------------------------------------------------------|-------------------------------------------------------------------------------------------------|----------------------------------------------------|
| Bailey, et al.<br>2017 (8) | Popula-<br>tion<br>based<br>&<br>control | 2003-<br>2004)<br>&<br>2010-<br>2011 | France | Hodgkin<br>lymphoma                   |               |     |                                         | (18.5-24.9), 492<br>(25+)                                                                                                                            |                                                           |                                                                                                 | maternal education,<br>birth year                  |
|                            |                                          |                                      |        | Burkitt<br>Lymphoma                   | 1045/8        |     |                                         | Cases: 7 (18.5-<br>24.9), 1 (25+)<br>Controls: 553<br>(18.5-24.9), 492<br>(25+)                                                                      | 18.5-24.9: referent, 25+:<br>0.17 (0.02-1.31)             | univariate                                                                                      |                                                    |
|                            |                                          |                                      |        | Childhood<br>brain<br>tumors<br>(any) | 1,291/2<br>82 | <15 | Self-report<br>(telephone<br>interview) | Cases: 28<br>(<18.5), 207<br>(18.5-24.9), 38<br>(25-29.9), 9<br>(30+)<br>Controls: 122<br>(<18.5), 915<br>(18.5-24.9), 189<br>(25-29.9), 65<br>(30+) | French<br>National<br>Registry of<br>Childhood<br>Cancers | <18.5: 1.1 (0.7-1.7), 18.5-<br>24.9: referent, 25-29.9:<br>0.9 (0.6-1.3), 30+: 0.6<br>(0.3-1.3) | childs sex, child's<br>age, year of birth<br>group |
|                            |                                          |                                      |        | Ependy-<br>omas                       | 1,291/2<br>9  |     |                                         | Cases: 2 (<18.5),<br>20 18.5-24.9, 5<br>(25-24.9), 2<br>(30+)<br>Controls: 122<br>(<18.5), 915<br>(18.5-24.9), 189<br>(25-29.9), 65<br>(30+)         |                                                           | <18.5: 0.9 (0.2-3.9), 18.5-<br>24.9: referent, 25-29.9:<br>1.1 (0.4-3.1), 30+: 1.2<br>(0.3-5.5) | childs sex, child's<br>age, year of birth<br>group |
|                            |                                          |                                      |        | Astrocyto-<br>mas                     | 1,291/9<br>0  |     |                                         | Cases: 10<br>(<18.5), 65<br>(18.5-24.9), 13<br>(25-29.9), 2<br>(30+)<br>Controls: 122<br>(<18.5), 915<br>(18.5-24.9), 189<br>(25-29.9), 65<br>(30+)  |                                                           | <18.5: 1.3 (0.6-2.6), 18.5-<br>24.9: referent, 25-29.9:<br>1.0 (0.5-1.9), 30+: 0.4<br>(0.1-1.9) | childs sex, child's<br>age, year of birth<br>group |
|                            |                                          |                                      |        | Embryona<br>l Tumors                  | 1,291/9<br>7  |     |                                         | Cases: 10<br>(<18.5), 68<br>(18.5-24.9), 15<br>(25-29.9), 4                                                                                          |                                                           | <18.5: 1.2 (0.6-2.4), 18.5-<br>24.9: referent, 25-29.9:<br>1.1 (0.6-1.9), 30+: 0.9<br>(0.3-2.4) | childs sex, child's<br>age, year of birth<br>group |



|                              |                 |                                                                      |                            |                       |
|------------------------------|-----------------|----------------------------------------------------------------------|----------------------------|-----------------------|
|                              |                 | 495,932 (25-29.9), 203,211 (30-34.9), 95,205 (35-39.9), 67,138 (40+) |                            |                       |
|                              |                 | Cases: 26                                                            |                            |                       |
|                              |                 | (<18.5), 278                                                         |                            |                       |
|                              |                 | (18.5-24.9), 140                                                     |                            |                       |
|                              |                 | (25-29.9), 67                                                        |                            |                       |
|                              |                 | (30-34.9), 40                                                        |                            |                       |
|                              |                 | (35-39.9), 30                                                        |                            |                       |
|                              |                 | (40+)                                                                |                            |                       |
|                              |                 | Total: 73,702                                                        |                            |                       |
|                              |                 | (<18.5), 876,011                                                     |                            |                       |
|                              |                 | (18.5-24.9),                                                         | <18.5: 1.13 (0.75-1.68),   |                       |
|                              |                 | 495,469 (25-29.9), 203,026                                           | 18.5-24.9: referent, 25-   |                       |
|                              |                 | (30-34.9), 95,112                                                    | 29.9: 0.95 (0.78-1.17),    |                       |
|                              |                 | (35-39.9), 67,063                                                    | 30-34.9: 1.12 (0.86-1.47), |                       |
|                              |                 | (40+)                                                                | 35-39.9: 1.45 (1.04-2.02), |                       |
|                              |                 | Cases: 21                                                            | 40+: 1.59 (1.09-2.32)      | Maternal age and race |
|                              |                 | (<18.5), 148                                                         |                            |                       |
|                              |                 | (18.5-24.9), 78                                                      |                            |                       |
|                              |                 | (25-29.9), 32                                                        |                            |                       |
|                              |                 | (30-34.9), 12                                                        |                            |                       |
|                              |                 | (35-39.9), 6                                                         |                            |                       |
|                              |                 | (40+)                                                                |                            |                       |
|                              |                 | Total: 73,702                                                        |                            |                       |
|                              |                 | (<18.5), 876,011                                                     |                            |                       |
|                              |                 | (18.5-24.9),                                                         | <18.5: 1.74 (1.10-2.75),   |                       |
|                              |                 | 495,469 (25-29.9), 203,026                                           | 18.5-24.9: referent, 25-   |                       |
|                              |                 | (30-34.9), 95,112                                                    | 29.9: 0.96 (0.73-1.26),    |                       |
|                              |                 | (35-39.9), 67,063                                                    | 30-34.9: 0.97 (0.66-1.42), |                       |
|                              |                 | (40+)                                                                | 35-39.9: 0.78 (0.43-1.41), |                       |
|                              |                 |                                                                      | 40+: 0.56 (0.25-1.27)      | Maternal age and race |
| Acute lymphoblastic leukemia | 1,810,383 (581) |                                                                      |                            |                       |
| Neuroblastoma                | 1,810,383 (297) |                                                                      |                            |                       |

<sup>a</sup>BMI: body mass index, OR: odds ratio, CI: confidence intervals

Supplementary Table 2. Main characteristics of the diabetes studies included in the meta-analysis<sup>a</sup>

| Study                         | Design                        | Study Period | Country        | Cancer(s)                    | Cohort: sample (cases)<br>Case-control: controls/cases | Age range     | Ascertainment of maternal diabetes diagnosis       | Number with (type of) maternal diabetes                                                            | Ascertainment of cancer diagnosis                                | OR (95% CI)                                                        | Adjusted covariates                                                                                                                                                                                                             |
|-------------------------------|-------------------------------|--------------|----------------|------------------------------|--------------------------------------------------------|---------------|----------------------------------------------------|----------------------------------------------------------------------------------------------------|------------------------------------------------------------------|--------------------------------------------------------------------|---------------------------------------------------------------------------------------------------------------------------------------------------------------------------------------------------------------------------------|
| Cnattingius, et al. 1995 (10) | Nested case-control           | 1973-1989    | Sweden         | Acute Lymphoblastic Leukemia | 3,065/613                                              | not specified | Medical Birth Registry                             | Cases: 5 (any)<br>Controls: 12 (any)                                                               | Swedish National Cancer Registry                                 | Any: 2.1 (0.7-5.9)                                                 | Adjusted for postpartum asphyxia, supplementary oxygen, and birth weight; matching variable: sex, birth year, birth month<br>Sociodemographic variables, lifestyle variables, environmental variables, and biomedical variables |
| Petridou, et al. 1997 (11)    | Case-control                  | 1993-1994    | Greece         | Leukemia                     | 300/153                                                | 0-14 years    | Self-report (interview administered questionnaire) | Cases: 3 (any)<br>Controls: 2 (any)                                                                | Nationwide network of childhood hematologists/oncologists        | Any: 2.99 (0.30-29.56)                                             | Year of birth, maternal age, parity, maternal smoking in early pregnancy                                                                                                                                                        |
| Åberg, et al. 2001            | Case-control (registry based) | 1987-1997    | Sweden         | Any malignancy               | 1,213,957/6304                                         | <10           | Swedish Medical Birth Registry                     | Cases: 20 (gestational), 20 (pregestational)<br>Total: 8,684 (gestational), 3,874 (pregestational) | Hospital Discharge Registry, National Board of Health, Stockholm | Gestational: 0.91 (0.58-1.43),<br>pregestational: 1.64 (1.06-2.54) | Child's gender, mother's race and education, household income                                                                                                                                                                   |
| Hamrick, et al. 2001 (12)     | Case-control                  | 1992-1994    | USA and Canada | Neuroblastoma                | 504/504                                                | <19           | Self-report (structured interview)                 | Cases: 28 (pregestational)<br>Controls: 24 (pregestational)                                        | Children's Cancer Group/Pediatric Oncology Group                 | Pregestational: 1.1 (0.6-2.1)                                      |                                                                                                                                                                                                                                 |

|                              |              |           |           |                              |                                            |                 |                                                                     |                                                                                                                                          |                                                                                                                     |                                                               |                                                                                                        |
|------------------------------|--------------|-----------|-----------|------------------------------|--------------------------------------------|-----------------|---------------------------------------------------------------------|------------------------------------------------------------------------------------------------------------------------------------------|---------------------------------------------------------------------------------------------------------------------|---------------------------------------------------------------|--------------------------------------------------------------------------------------------------------|
| Westbom, et al. 2002 (13)    | Case-control | 1987-1998 | Sweden    | Any malignancy               | 1,285,100 (1419)                           | 1-?             | Swedish Medical Birth Registry                                      | Cases: 10 (any)<br>Noncases: 4380 (any)<br>Cases: 13 (pregestational), 2 (gestational)<br>Controls: 77 (pregestational), 9 (gestational) | Swedish National Cancer Registry                                                                                    | Any: 2.25 (1.22-4.15)                                         | Year of birth, maternal age, parity, multiple births, 500g birth weight class                          |
| Podvin, et al. 2006 (14)     | Case-control | 1981-2003 | US (WA)   | Leukemia                     | 5535/549                                   | <20 years       | Birth Records                                                       | Cases: 25 (gestational)<br>Controls: 164 (gestational)                                                                                   | Washington State Cancer Registry                                                                                    | Pregestational: 1.4 (0.8-2.7),<br>gestational: 2.3 (0.5-11.0) | Maternal age<br>Birth year, gender, race and ethnicity, maternal age, gestational age and birth weight |
| McLaughlin, et al. 2006 (15) | Case-cohort  | 1985-2001 | US (NY)   | Acute Lymphoblastic Leukemia | 9,249/871                                  | 1 month-9 years | Birth certificates                                                  | Cases: 1 (gestational)<br>Controls: 164 (gestational)                                                                                    | New York State Cancer Registry                                                                                      | Gestational: 1.44 (0.91-2.18)                                 | Birth year, gender, race and ethnicity, maternal age, gestational age and birth weight                 |
|                              |              |           |           | Acute Myeloid Leukemia       | 9,249/146                                  |                 |                                                                     |                                                                                                                                          | Cancer Surveillance System of Western Washington (1980-1992); Washington State Cancer Registry (1993-2004). ICD-O-3 | Gestational: 0.26 (0.02-1.18)                                 |                                                                                                        |
| Chow, et al. 2007 (16)       | Case control | 1980-2004 | US (WA)   | Neuroblastoma                | 2,400/240 - any<br>2,060/206 - gestational | <20             | Birth certificate, Comprehensive Hospital Abstract Reporting System | Cases: 12 (any)<br>Controls: 72 (any)<br>Cases: 12 (gestational)<br>Controls: 67 (gestational)                                           |                                                                                                                     | Any: 1.71 (0.91-3.22)                                         | Birth year                                                                                             |
| Milne, et al. 2007 (17)      | Cohort       | 1980-2004 | Australia | Acute Lymphoblastic Leukemia | 576314 (243)                               | <15 years       | Reproductive Technology Register and Western                        | Cases: 0 (pregestational), 3 (gestational)                                                                                               | Cancer registrations                                                                                                | Gestational: 1.84 (0.98-3.47)                                 | Birth year<br><br>Univariate                                                                           |

|                              |               |           |               |                              |             |                     |                                   |                                                                                                   |                                                                       |                                  |                                                                              |
|------------------------------|---------------|-----------|---------------|------------------------------|-------------|---------------------|-----------------------------------|---------------------------------------------------------------------------------------------------|-----------------------------------------------------------------------|----------------------------------|------------------------------------------------------------------------------|
|                              |               |           |               |                              |             |                     | Australian Birth Defects Registry | Noncases: 783 (pregestational), 9,587 (gestational)<br>Cases: 0 (pregestational), 1 (gestational) |                                                                       |                                  |                                                                              |
|                              |               |           |               | Acute Myeloid Leukemia       | 576314 (36) |                     |                                   | Noncases: 783 (pregestational), 9,587 (gestational)<br>Cases: 22 (any)                            | Gestational: 2.15 (0.29-15.72)<br>Any: 0.9 (0.5-1.6)                  |                                  | Univariate                                                                   |
| Daniels, et al. 2008 (18)    | Case-control  | 1999-2002 | US and Canada | Wilms Tumor                  | 517/521     | <16 days – 14 years | Self-report (telephone interview) | Controls: 30 (any)<br>Cases: 8 (any)                                                              | National Wilms Tumor Study Group Minnesota Cancer Surveillance System |                                  | Child's age, study region, child's sex, maternal education, household income |
| Johnson, et al. 2008 (19)    | Case-cohort   | 1988-2004 | US (MN)       | Lymphoblastic Leukemia       | 3304 (237)  |                     | Birth Records                     | Cohort: 110 (any)<br>Cases: 0 (any)                                                               |                                                                       | Any: 1.00 (0.48-2.08)            | Birth year                                                                   |
|                              |               |           |               | Acute myeloid leukemia       | 3304 (33)   |                     |                                   | Cohort: 110 (any)<br>Cases: 16 (gestational)                                                      |                                                                       | NA                               | Maternal age, maternal education, maternal race, child's sex, child's age    |
| Ognjanovic, et al. 2009 (20) | Case-control  | 1997-2002 | US and Canada | Leukemia                     | 173/158     | <19                 | Self-report (telephone interview) | Controls: 19 (gestational)<br>Cases: 10 (gestational)                                             | Children's Oncology Group                                             | Gestational: 0.87 (0.42-1.80)    | Maternal age, maternal education, maternal race, child's sex, child's age    |
|                              |               |           |               | Acute lymphoblastic leukemia | 173/97      |                     |                                   | Controls: 19 (gestational)<br>Cases: 6 (gestational)                                              |                                                                       | Gestational: 0.91 (0.39-2.11)    | Maternal age, maternal education, maternal race, child's sex, child's age    |
|                              |               |           |               | Acute myeloid leukemia       | 173/61      |                     |                                   | Controls: 19 (gestational)                                                                        |                                                                       | Gestational: 0.86 (0.30-2.46)    | Maternal age, maternal education, maternal race, child's sex, child's age    |
| Heck, et al. 2012 (21)       | Records based | 1988-2007 | US (CA)       | Retinoblastoma               | 209,051/609 | <5                  | Birth Certificates                | Cases: 10 (pregestational)                                                                        | California Cancer Registry                                            | Pregestational: 0.86 (0.46-1.62) | Year of birth, father's age, urban or rural                                  |

| Author (Year)               | Study Design           | Year      | Country       | Cancer Type                 | Cases (n)        | Age Group | Source                                                                  | Controls (n)                                                                                                                                          | Source                                       | OR (95% CI)                                                                         | Exclusion/Adjustment                                                                                                                                                                                                                                                                                                                                                                                                                                                                                                                                                                                                                                                                                |
|-----------------------------|------------------------|-----------|---------------|-----------------------------|------------------|-----------|-------------------------------------------------------------------------|-------------------------------------------------------------------------------------------------------------------------------------------------------|----------------------------------------------|-------------------------------------------------------------------------------------|-----------------------------------------------------------------------------------------------------------------------------------------------------------------------------------------------------------------------------------------------------------------------------------------------------------------------------------------------------------------------------------------------------------------------------------------------------------------------------------------------------------------------------------------------------------------------------------------------------------------------------------------------------------------------------------------------------|
| Wu, et al. 2012 (22)        | case-control<br>Cohort | 1977-2008 | Denmark       | Any malignancy              | 1,781,576 (7314) | <30       | Danish National Hospital Register and Danish National Diabetes Register | 3755 (pregestational)<br>Cases: 65 (any), 19 (pregestational), 8 (gestational)<br>Cohort: 25,651 (any), 12,401 (pregestational), 11,507 (gestational) | Danish National Hospital Register            | Any: 1.3 (1.0-1.7),<br>pregestational: 1.9 (1.2-3.0),<br>gestational: 0.7 (0.3-1.3) | county of residence, mother's race and birthplace<br><br>Excluded those with congenital malformations; adjusted for: maternal age, parity, sex, maternal education, maternal marital status, year, gestational age at birth, birth weight, square of birth weight<br>Year of birth, birth weight, sex, maternal age, maternal smoking, plurality, maternal race<br>Child's age at interview, mother's race/ethnicity, maternal education, household income, maternal age at childbirth, maternal tobacco smoking during pregnancy<br>Child's age at interview, mother's race/ethnicity, maternal education, household income, maternal age at childbirth, maternal tobacco smoking during pregnancy |
| Musselman, et al. 2013 (23) | Case-control           | 2000-2008 | US            | Hepatoblastoma              | 387/383          | <6        | Self-report (telephone interview)                                       | Not reported                                                                                                                                          | Children's Oncology Group                    | Gestational: 0.79 (0.43-1.48)                                                       | Child's age at interview, mother's race/ethnicity, maternal education, household income, maternal age at childbirth, maternal tobacco smoking during pregnancy<br>Child's age at interview, mother's race/ethnicity, maternal education, household income, maternal age at childbirth, maternal tobacco smoking during pregnancy                                                                                                                                                                                                                                                                                                                                                                    |
| Heck, et al. 2015 (4)       | Case-control           | 2006-2011 | US and Canada | Retinoblastoma (unilateral) | 136/165          | 0-14      | Self-report (telephone interview)                                       | Cases: 17 (any), 14 (gestational)<br>Controls: 6 (any), 6 (gestational)                                                                               | Wills Eye Hospital/Children's Oncology Group | Any: 2.2 (0.8-6.6),<br>gestational: 1.9 (0.6-5.7)                                   | Child's age at interview, mother's race/ethnicity, maternal education, household income, maternal age at childbirth, maternal tobacco smoking during pregnancy<br>Child's age at interview, mother's race/ethnicity, maternal education, household income, maternal age at childbirth, maternal tobacco smoking during pregnancy                                                                                                                                                                                                                                                                                                                                                                    |
|                             |                        |           |               | Retinoblastoma (bilateral)  | 136/87           | 0-14      |                                                                         | Cases: 8 (any), 8 (gestational)<br>Controls: 6 (any), 6 (gestational)                                                                                 |                                              | Any: 1.9 (0.6-6.6),<br>gestational: 1.9 (0.6-6.6)                                   | Child's age at interview, mother's race/ethnicity, maternal education, household income, maternal age at childbirth, maternal tobacco smoking during pregnancy                                                                                                                                                                                                                                                                                                                                                                                                                                                                                                                                      |

|                            |                             |           |                                      |                                |                 |                  |                                |                                                                                                              |                                     |                                                                  |                                                                                                |
|----------------------------|-----------------------------|-----------|--------------------------------------|--------------------------------|-----------------|------------------|--------------------------------|--------------------------------------------------------------------------------------------------------------|-------------------------------------|------------------------------------------------------------------|------------------------------------------------------------------------------------------------|
| Petridou, et al. 2015 (5)  | Cohort                      | 1973-2007 | Sweden                               | Hodgkin lymphoma               | 3,444,136 (169) | 28 days-14 years | Swedish Medical Birth Registry | Cases: 1 (pregestational)<br>Noncases: 14,972 (pregestational)                                               | Swedish National Cancer Registry    | Pregestational: 1.45 (0.20-10.4)                                 | Sex, maternal education, maternal age, gestational age, birth order                            |
|                            |                             |           |                                      | Non-Hodgkin lymphoma           | 3,444,136 (515) |                  |                                | Cases: 4 (pregestational)<br>Noncases: 14,969 (pregestational)                                               |                                     | Pregestational: 1.79 (0.67-4.79)                                 | Sex, maternal education, maternal age, gestational age, birth order                            |
| Vienneau, et al. 2016 (24) | Case-control Registry based | 2004-2008 | Denmark, Sweden, Norway, Switzerland | Brain tumor (intracranial CNS) | 624/347         | 7-19 years       | Self-report (Interview)        | Cases: 6 (any maternal diabetes)<br>Controls: 14                                                             | Medical records                     | Any: 0.76 (0.29-2.02)                                            | Matched on sex, age group, geographic region; adjusted for maternal age and parental education |
| Contreras, et al. 2016 (6) | case-control                | 1988-2013 | US (CA)                              | Overall                        | 270,147/11,149  | <6               | Birth records                  | N/A<br>Cases: 94 (pregestational), 17 (gestational)<br>Controls: 4,289 (pregestational), 1,667 (gestational) | California Cancer Registry (ICCC-3) | N/A                                                              | Year of birth, maternal/paternal race/ethnicity, maternal age                                  |
|                            |                             |           |                                      | Acute lymphoblastic leukemia   | 270,147/4,101   |                  |                                | Cases: 4 (pregestational), 4 (gestational)<br>Controls:                                                      |                                     | Pregestational: 1.37 (1.11, 1.69), gestational: 1.26 (0.77-2.05) | Year of birth, maternal/paternal race/ethnicity, maternal age                                  |
|                            |                             |           |                                      | Acute myeloid leukemia         | 270,147/706     |                  |                                | Controls:                                                                                                    |                                     | N/A                                                              |                                                                                                |



|                 |                   |                                                                                                                                                                                                                                                                                                                                                                                                                                                                                                                                               |                                                                          |                                                                        |
|-----------------|-------------------|-----------------------------------------------------------------------------------------------------------------------------------------------------------------------------------------------------------------------------------------------------------------------------------------------------------------------------------------------------------------------------------------------------------------------------------------------------------------------------------------------------------------------------------------------|--------------------------------------------------------------------------|------------------------------------------------------------------------|
| Leukemia        | 270,147/<br>5,034 | 4,289<br>(pregestational), 1,667<br>(gestational)<br>Cases: 104<br>(pregestational), 24<br>(gestational)<br>Controls:<br>4,289<br>(pregestational), 1,667<br>(gestational)<br>Cases: 11<br>(pregestational), 6<br>(gestational)<br>Controls:<br>4,289<br>(pregestational), 1,667<br>(gestational)<br>Cases: 6<br>(pregestational), 5<br>(gestational)<br>Controls:<br>4,289<br>(pregestational), 1,667<br>(gestational)<br>Cases: 7<br>(pregestational), 2<br>(gestational)<br>Controls:<br>4,289<br>(pregestational), 1,667<br>(gestational) | Pregestational:<br>1.23 (1.01-1.49),<br>gestational: 1.14<br>(0.76-1.72) | Year of birth,<br>maternal/paternal<br>race/ethnicity,<br>maternal age |
| Astrocytoma     | 270,147/<br>990   | 4,289<br>(pregestational), 1,667<br>(gestational)<br>Cases: 6<br>(pregestational), 5<br>(gestational)<br>Controls:<br>4,289<br>(pregestational), 1,667<br>(gestational)<br>Cases: 7<br>(pregestational), 2<br>(gestational)<br>Controls:<br>4,289<br>(pregestational), 1,667<br>(gestational)                                                                                                                                                                                                                                                 | Pregestational:<br>0.71 (0.39-1.30),<br>gestational: 1.32<br>(0.58-3.02) | Year of birth,<br>maternal/paternal<br>race/ethnicity,<br>maternal age |
| Embryonal Tumor | 270,147/<br>709   | 4,289<br>(pregestational), 1,667<br>(gestational)<br>Cases: 7<br>(pregestational), 2<br>(gestational)<br>Controls:<br>4,289<br>(pregestational), 1,667<br>(gestational)                                                                                                                                                                                                                                                                                                                                                                       | Pregestational:<br>0.54 (0.24-1.20),<br>gestational: 1.25<br>(0.51-3.07) | Year of birth,<br>maternal/paternal<br>race/ethnicity,<br>maternal age |
| Germ cell tumor | 270,147/<br>445   | 4,289<br>(pregestational), 1,667<br>(gestational)                                                                                                                                                                                                                                                                                                                                                                                                                                                                                             | Pregestational:<br>0.97 (0.46-2.06),<br>gestational: N/A                 | Year of birth,<br>maternal/paternal<br>race/ethnicity,<br>maternal age |

|                  |                   |                                                                                                                                                                                                                                            |                                                                                                                                      |                                                                                                                                                  |
|------------------|-------------------|--------------------------------------------------------------------------------------------------------------------------------------------------------------------------------------------------------------------------------------------|--------------------------------------------------------------------------------------------------------------------------------------|--------------------------------------------------------------------------------------------------------------------------------------------------|
| Hepatoblastoma   | 270,147/<br>337   | Cases: 7<br>(pregestational), 5<br>(gestational)<br>Controls:<br>4,289<br>(pregestational), 1,667<br>(gestational)<br>Cases: 18<br>(pregestational), 12<br>(gestational)<br>Controls:<br>4,289<br>(pregestational), 1,667<br>(gestational) | Pregestational:<br>1.22 (0.58-2.60),<br>gestational: 1.49<br>(0.60-3.70)                                                             | Year of birth,<br>maternal/paternal<br>race/ethnicity,<br>maternal age                                                                           |
| Neuroblastoma    | 270,147/<br>1,378 | Cases: 11<br>(pregestational), 7<br>(gestational)<br>Controls:<br>4,289<br>(pregestational), 1,667<br>(gestational)                                                                                                                        | Pregestational:<br>0.85 (0.53-1.35),<br>gestational: 1.31<br>(0.73-2.34)                                                             | Year of birth,<br>maternal/paternal<br>race/ethnicity,<br>maternal age                                                                           |
| Retinoblastoma   | 270,147/<br>741   | Cases: 5<br>(pregestational), 1<br>(gestational)<br>Controls:<br>4,289<br>(pregestational), 1,667<br>(gestational)                                                                                                                         | Pregestational:<br>0.93 (0.51-1.69),<br>gestational: 1.34<br>(0.63-2.88)                                                             | Year of birth,<br>maternal/paternal<br>race/ethnicity,<br>maternal age                                                                           |
| Rhabdomyosarcoma | 270,147/<br>463   | Cases: 25<br>(pregestational), 7<br>(gestational)<br>Controls:<br>4,289<br>(pregestational), 1,667<br>(gestational)                                                                                                                        | Pregestational:<br>0.66 (0.27-1.60),<br>gestational: N/A<br>Pregestational:<br>1.45 (0.97-2.18),<br>gestational: 1.23<br>(0.57-2.63) | Year of birth,<br>maternal/paternal<br>race/ethnicity,<br>maternal age<br>Year of birth,<br>maternal/paternal<br>race/ethnicity,<br>maternal age |
| Wilms tumor      | 270,147/<br>1,052 |                                                                                                                                                                                                                                            |                                                                                                                                      |                                                                                                                                                  |

| Author                     | Study Design          | Year      | Country | Cancer Type                  | Population Size   | Age Group | Source                                                                        | Cases (pregestational/gestational) | Database                             | OR (95% CI)                                                                                                    | Adjustment Factors                                                                                                                                      |
|----------------------------|-----------------------|-----------|---------|------------------------------|-------------------|-----------|-------------------------------------------------------------------------------|------------------------------------|--------------------------------------|----------------------------------------------------------------------------------------------------------------|---------------------------------------------------------------------------------------------------------------------------------------------------------|
| Deleskog, et al. 2017 (25) | Registry-based cohort | 1973-2015 | Sweden  | All cancers                  | 4,239,965 (8,839) | 0-15      | ICD codes in Medical Brith Register, hospital inpatient/outpatient registers. | 51 (pregestational/gestational)    | Nationwide Cancer Register (ICD-7/8) | Any: 1.06 (0.89-1.26),<br>pregestational: 1.09 (0.74-1.60),<br>gestational: 0.94 (0.72-1.24),                  | Child's sex, decade of birth, maternal age, parental education, birth order, birthweight, gestational age, child's diabetes status, child birth defects |
|                            |                       |           |         | Brain                        | 4,239,965 (2,079) |           |                                                                               | 4 (pregestational/gestational)     |                                      | Any: 0.56 (0.35-0.91),<br>pregestational: 1.24 (0.59-2.60),<br>gestational: 0.34 (0.13-0.90),                  | Child's sex, decade of birth, maternal age, parental education, birth order, birthweight, gestational age, child's diabetes status, child birth defects |
|                            |                       |           |         | Leukemia                     | 4,239,965 (2,687) |           |                                                                               | 24 (pregestational/gestational)    |                                      | Any: 1.47 (1.13-1.92),<br>pregestational: 1.10 (0.55-2.20),<br>gestational: 1.41 (0.94-2.11)                   | Child's sex, decade of birth, maternal age, parental education, birth order, birthweight, gestational age, child's diabetes status, child birth defects |
|                            |                       |           |         | Acute lymphoblastic leukemia | 4,239,965 (2,091) |           |                                                                               | 20 (pregestational/gestational)    |                                      | Any maternal diabetes: 1.64 (1.23-2.18),<br>pregestational: 1.24 (0.59-2.60),<br>gestational: 1.51 (0.97-2.35) | Child's sex, decade of birth, maternal age, parental education, birth order, birthweight, gestational age, child's diabetes status, child birth defects |
|                            |                       |           |         | Lymphoma                     | 4,239,965 (901)   |           |                                                                               | 4 (pregestational/gestational)     |                                      | Any: 1.45 (0.90-2.36),<br>pregestational:                                                                      | Child's sex, decade of birth, maternal age, parental education,                                                                                         |

|                               |                                                                             |               |             |                                        |                     |     |                                                                          |                                                                                                                                                                                              |                                                                                                   |                                                                                                     |                                                                                                                                      |
|-------------------------------|-----------------------------------------------------------------------------|---------------|-------------|----------------------------------------|---------------------|-----|--------------------------------------------------------------------------|----------------------------------------------------------------------------------------------------------------------------------------------------------------------------------------------|---------------------------------------------------------------------------------------------------|-----------------------------------------------------------------------------------------------------|--------------------------------------------------------------------------------------------------------------------------------------|
|                               |                                                                             |               |             |                                        |                     |     |                                                                          | al), 8<br>(gestational)                                                                                                                                                                      | 1.64 (0.61-4.40),<br>gestational: 1.56<br>(0.78-3.15)                                             | birth order,<br>birthweight,<br>gestational age, child's<br>diabetes status, child<br>birth defects |                                                                                                                                      |
| Søegaard, et al.<br>2018 (26) | Registry<br>based<br>cohort                                                 | 1996-<br>2015 | Denmar<br>k | Acute<br>lymphobla<br>stic<br>leukemia | 1,187,48<br>2 (492) | <15 | Danish<br>National<br>Patient<br>Register                                | Cases: 6<br>(pregestation<br>al), 14<br>(gestational)<br>Total: 5,409<br>(pregestation<br>al), 24,306<br>(gestational)<br>Cases: 2<br>(pregestation<br>al)                                   | Nordic Society<br>of Paediatric<br>Haematology<br>and Oncology                                    | Pregestational:<br>2.91 (1.30–6.51),<br>gestational: 1.75<br>(1.02–2.98)                            | Maternal age,<br>ethnicity, birth order,<br>maternal smoking,<br>birth cohort, birth<br>weight, gestational<br>age, mode of delivery |
| Borsari, et al.<br>2019 (27)  | Popula<br>tion-<br>based<br>cohort<br>study                                 | 1998-<br>2017 | Italy       | Acute<br>lymphobla<br>stic<br>leukemia | 241,958<br>(145)    | <15 | Hospital<br>discharge<br>records (ICD-<br>9)                             | Total: 1,321<br>(pregestation<br>al)<br>Cases: 13<br>(gestational)<br>Controls: 107<br>(gestational)                                                                                         | National<br>Childhood<br>Cancer Register<br>French National<br>Registry of<br>Childhood<br>Cancer | Pregestational: 2.7<br>(0.7-11.1)                                                                   | "Maternal<br>demographic<br>characteristics"                                                                                         |
| Bauer, et al.<br>2019 (28)    | Case-<br>control<br>Popula<br>tion-<br>based<br>retrosp<br>ective<br>cohort | 2010-<br>2011 | France      | Wilms<br>Tumor                         | 1,097/11<br>7       | <11 | Self-report<br>(telephone<br>interview)                                  |                                                                                                                                                                                              |                                                                                                   | gestational: 1.3<br>(0.7-2.4)                                                                       | Age, gender, birth<br>order, maternal age                                                                                            |
| Kessous, et al.<br>2019 (29)  | Popula<br>tion-<br>based<br>retrosp<br>ective<br>cohort                     | 1991-<br>2014 | Israel      | Any<br>malignanc<br>y                  | 236,893<br>(241)    | <18 | Hospital<br>obstetrics and<br>gynecology<br>database (ICD-<br>9)         | 10,294 with<br>gestational<br>diabetes<br>Cases: 241<br>(any), 29<br>(pregestation<br>al), 212<br>(gestational)<br>Controls: 940<br>(any), 128<br>(pregestation<br>al), 812<br>(gestational) | Hospital<br>database (ICD-<br>9)                                                                  | Gestational: 1.03<br>(0.58-1.82)                                                                    | Maternal age,<br>hypertensive<br>disorders, gestational<br>age at delivery                                                           |
| Seppälä, et al.<br>2020 (30)  | Case-<br>control                                                            | 1996-<br>2014 | Finland     | Any<br>malignanc<br>y                  | 10,103/2,<br>029    | <20 | Medical Birth<br>Register and<br>the Care<br>Register for<br>Health Care |                                                                                                                                                                                              | Finnish Cancer<br>Registry                                                                        | Any: 1.28 (1.10-<br>1.50), gestational:<br>1.31 (1.11-1.54),<br>pregestational:<br>1.11 (0.73-1.69) | Maternal age, parity,<br>smoking                                                                                                     |

---

<sup>a</sup> BMI: body mass index, OR: odds ratio, CI: confidence intervals, ICD: International Classification of Diseases

Supplementary Table 3. Main characteristics of gestational weight gain studies included in the meta-analysis<sup>a</sup>

| Study                         | Design       | Study Period | Country | Cancer(s)                    | Cohort: sample (cases)<br>Case-control: controls/cases | Age range         | Ascertainment of weight gain | Number of mothers in (weight gain categories)<br>Cases: 60, (<8.6 kg) , 65 (9.1-11.3 kg), 83 (11.8-13.6 kg), 158 (14.1-18.1 kg), 101 (18.6+ kg)<br>Controls: 511 (<8.6 kg), 696 (9.1-11.3 kg), 749 (11.8-13.6 kg), 1,138 (14.1-18.1 kg), 766 (18.6+ kg) | Ascertainment of cancer diagnosis                               | OR (95% CI)                                                                                                                                  | Adjusted covariates                                                                    |
|-------------------------------|--------------|--------------|---------|------------------------------|--------------------------------------------------------|-------------------|------------------------------|---------------------------------------------------------------------------------------------------------------------------------------------------------------------------------------------------------------------------------------------------------|-----------------------------------------------------------------|----------------------------------------------------------------------------------------------------------------------------------------------|----------------------------------------------------------------------------------------|
| McLaughlin, et al. 2006a (15) | Case-cohort  | 1988-2001    | US (NY) | Acute lymphoblastic leukemia | 3860/467                                               | 1 month-9 years   | Birth certificates           | Cases: 19 (<8.6 kg), 18 (9.1-11.3 kg), 17 (11.8-13.6 kg), 25 (14.1-18.1 kg), 19 (18.6+ kg)<br>Controls: 511 (<8.6 kg), 696 (9.1-11.3 kg), 749 (11.8-13.6 kg), 1,138 (14.1-18.1 kg), 766 (18.6+ kg)                                                      | New York State Cancer Registry                                  | <8.6 kg: 1.31 (0.90-1.91), 9.1-11.3 kg: referent, 11.8-13.6 kg: 1.12 (0.79-1.59), 14.1-18.1 kg: 1.42 (1.04-1.94), 18.6 kg+: 1.38 (0.99-1.94) | Birth year, gender, race and ethnicity, maternal age, gestational age and birth weight |
|                               |              |              |         | Acute myeloid leukemia       | 3860/98                                                |                   |                              | Cases: 4 (<10 lbs), 9 (10-19 lbs), 16 (20-29 lbs), 10 (30-39 lbs), 7 (40+ lbs)<br>Controls: 120 (<10 lbs), 394 (10-19 lbs), 1,143 (20-29 lbs), 986 (40+ lbs)                                                                                            |                                                                 | <8.6 kg: 1.45 (0.73-2.90), 9.1-11.3 kg: referent, 11.8-13.6 kg: 0.90 (0.44-1.84), 14.1-18.1 kg: 0.88 (0.47-1.71), 18.6 kg+: 0.83 (0.41-1.68) | Birth year, gender, race and ethnicity, maternal age, gestational age and birth weight |
| McLaughlin, et al. 2006b (1)  | Case-cohort  | 1988-2001    | US (NY) | Hepatoblastoma               | 3,879/46                                               | 1 month - 5 years | Birth records                | Cases: 10 (<10 lbs), 82 (10-29 lbs), 135 (30-49lbs), 18 (50+lbs)<br>Controls: 66 (<10 lbs),                                                                                                                                                             | New York State Cancer Registry Washington State Cancer Registry | <10 lbs: 1.5 (0.4-4.6), 10-19 lbs: 1.0 (0.4-2.5), 20-29 lbs: referent, 30-39 lbs: 0.7 (0.3-1.5), 40+ lbs: 0.5 (0.2-1.3)                      | Birth year, birth weight                                                               |
| Podvin, et al. 2006 (14)      | Case-control | 1989-2002    | US (WA) | Leukemia                     | 2,415/24<br>5                                          | <20 years         | Birth records                |                                                                                                                                                                                                                                                         |                                                                 | <10lbs: 1.5 (0.7-3.0), 10- 29 lbs: referent, 30-49 lbs:                                                                                      | Maternal age                                                                           |

|                              |                            |           |           |                                                       |             |                    |                                    |                                                                                                                                                                                                                                                                                                                                                                                                                                                                                                |                                                                                                                                                                                                                                                                                                                                                                                                                                                                                                                           |  |                                                                                                                                                                                                                                                                                                                                      |
|------------------------------|----------------------------|-----------|-----------|-------------------------------------------------------|-------------|--------------------|------------------------------------|------------------------------------------------------------------------------------------------------------------------------------------------------------------------------------------------------------------------------------------------------------------------------------------------------------------------------------------------------------------------------------------------------------------------------------------------------------------------------------------------|---------------------------------------------------------------------------------------------------------------------------------------------------------------------------------------------------------------------------------------------------------------------------------------------------------------------------------------------------------------------------------------------------------------------------------------------------------------------------------------------------------------------------|--|--------------------------------------------------------------------------------------------------------------------------------------------------------------------------------------------------------------------------------------------------------------------------------------------------------------------------------------|
|                              |                            |           |           |                                                       |             |                    |                                    | 817 (10-29 lbs), 1,296 (30-49 lbs), 236 (50+lbs)<br>Cases: 17 (<24lbs), 32 (25-30lbs), 16 (31-36lbs), 23 (>36lbs)<br>Subcohort: 1,029 (<24lbs), 1,295 (25-30lbs), 616 (31-36lbs), 910 (>36lbs)<br>Cases: 46 (<9.07 kg), 72 (9.53-13.61 kg), 61 (13.61-18.14 kg), 61 (>18.14kg)<br>Controls: 55 (9.07 kg), 82 (9.53-13.61 kg), 63 (13.61-18.14 kg), 55 (>18.14 kg)<br>Cases: 72 (<9.1 kg), 78 (9.1-13.2 kg), 177 (13.6+ kg)<br>Controls: 1,172 (<9.1 kg), 1,501 (9.1-13.2 kg), 3,235 (13.6+ kg) | 1.0 (0.8-1.4), 50+ lbs: 0.8 (0.5-1.3)<br><br><24lbs: referent, 25-30lbs: 1.46 (0.80-2.67), 31-36lbs: 1.63 (0.81-3.26), 36+ lbs: 1.53 (0.81-2.90)<br><br><9.07 kg: referent, 9.52-13.61 kg: 1.16 (0.68-1.99), 13.61-18.14 kg: 1.25 (0.71-2.21), 18.14+ kg: 1.50 (0.84-2.68)<br><br><9.1kg: referent, 9.1-13.2kg: 0.8 (0.6-1.2), 13.6+kg: 0.9 (0.6-1.2)<br><br>Inadequate: 1.8 (1.2-2.6), appropriate: referent, excessive: 1.4 (1.0-2.1)<br><br>Inadequate: 1.9 (1.1-3.3), appropriate: referent, excessive: 1.5 (0.9-2.6) |  |                                                                                                                                                                                                                                                                                                                                      |
| Puumala, et al. 2007 (31)    | Case-cohort                | 1988-2004 | US (MN)   | Wilms tumor                                           | 8,890 (138) | 28 days - 14 years | Birth certificate                  |                                                                                                                                                                                                                                                                                                                                                                                                                                                                                                | Minnesota Cancer Surveillance System                                                                                                                                                                                                                                                                                                                                                                                                                                                                                      |  | Sex, birth year                                                                                                                                                                                                                                                                                                                      |
| Spector, et al. 2007 (2)     | Case-control               | 1996-2002 | US        | Acute lymphoblastic leukemia & acute myeloid leukemia | 255/240     | < 1 year           | Self-report (interview)            |                                                                                                                                                                                                                                                                                                                                                                                                                                                                                                | Childrens Oncology Group                                                                                                                                                                                                                                                                                                                                                                                                                                                                                                  |  | Sex, race, maternal education, pre-pregnancy BMI                                                                                                                                                                                                                                                                                     |
| McLaughlin, et al. 2009 (32) | Registry based case-cohort | 1985-2001 | US (NY)   | Neuroblastoma                                         | 7,294/397   | 1 month - 14 years | Birth certificate                  |                                                                                                                                                                                                                                                                                                                                                                                                                                                                                                | New York State Cancer Registry (ICD-O-3)                                                                                                                                                                                                                                                                                                                                                                                                                                                                                  |  | Birth year, region, child's gender, race, birthweight<br>Child's age at diagnosis or recruitment, child's sex, state of residence, child's year of birth group, maternal age group, maternal pre-pregnancy supplementation<br>Child's age at diagnosis or recruitment, child's sex, state of residence, child's year of birth group, |
| Greenop, et al. 2014 (3)     | Case control               | 2005-2010 | Australia | Any childhood brain tumor                             | 1,079/319   | 0-14               | Self-report (questionnaire/survey) | Cases: 108 (inadequate), 56 (appropriate), 93 (excessive)<br>Controls: 225 (inadequate), 208 (appropriate), 236 (excessive)<br><br>Cases: 53 (inadequate), 25 (appropriate), 44 (excessive)<br>Controls: 225 (inadequate), 208                                                                                                                                                                                                                                                                 | National pediatric oncology centers                                                                                                                                                                                                                                                                                                                                                                                                                                                                                       |  |                                                                                                                                                                                                                                                                                                                                      |
|                              |                            |           |           | Low grade gliomas                                     | 1,079/151   |                    |                                    |                                                                                                                                                                                                                                                                                                                                                                                                                                                                                                |                                                                                                                                                                                                                                                                                                                                                                                                                                                                                                                           |  |                                                                                                                                                                                                                                                                                                                                      |

|                               |                                       |               |                  |                                                   |                    |      |                                                                                              |                                                                                                                                           |                                                                                        |                                                                                                                                                                                               |                                                                                        |
|-------------------------------|---------------------------------------|---------------|------------------|---------------------------------------------------|--------------------|------|----------------------------------------------------------------------------------------------|-------------------------------------------------------------------------------------------------------------------------------------------|----------------------------------------------------------------------------------------|-----------------------------------------------------------------------------------------------------------------------------------------------------------------------------------------------|----------------------------------------------------------------------------------------|
|                               |                                       |               |                  |                                                   |                    |      |                                                                                              | (appropriate), 236<br>(excessive)                                                                                                         |                                                                                        | maternal age group,<br>maternal pre-<br>pregnancy<br>supplementation                                                                                                                          |                                                                                        |
|                               |                                       |               |                  | Embryonal<br>tumors                               | 1,079/75           |      |                                                                                              | Cases: 23 (inadequate),<br>17 (appropriate), 22<br>(excessive)<br>Controls: 225<br>(inadequate), 208<br>(appropriate), 236<br>(excessive) | inadequate: 1.2<br>(0.6-2.4),<br>appropriate:<br>referent, excessive:<br>1.1 (0.6-2.7) | Child's age at<br>diagnosis or<br>recruitment, child's<br>sex, state of<br>residence, child's<br>year of birth group,<br>maternal age group,<br>maternal pre-<br>pregnancy<br>supplementation |                                                                                        |
| Heck, et al.<br>2015 (4)      | Case<br>control                       | 2006-<br>2011 | US and<br>Canada | Retinoblast<br>oma<br>(unilateral)                | 136/165            | 0-14 | Self-report<br>(telephone<br>interview)                                                      | Cases: 26 (inadequate),<br>64 (appropriate), 87<br>(excessive)<br>Controls: 23<br>(inadequate), 51<br>(appropriate), 61<br>(excessive)    | Wills Eye<br>Hospital/<br>Children's<br>Oncology<br>Group                              | Inadequate: 0.8<br>(0.4-1.8),<br>appropriate:<br>referent, excessive:<br>1.1 (0.6-1.8)                                                                                                        | Child's age,<br>maternal<br>race/ethnicity,<br>maternal education,<br>household income |
|                               |                                       |               |                  | Retinoblast<br>oma<br>(bilateral)                 | 136/87             |      |                                                                                              | Cases: 12 (inadequate),<br>34 (appropriate), 46<br>(excessive)<br>Controls: 23<br>(inadequate), 51<br>(appropriate), 61<br>(excessive)    |                                                                                        | Inadequate: 0.8<br>(0.3-2.0),<br>appropriate:<br>referent, excessive:<br>0.8 (0.4-1.6)                                                                                                        | Child's age,<br>maternal<br>race/ethnicity,<br>maternal education,<br>household income |
| Contreras, et al.<br>2016 (6) | Registry<br>based<br>case-<br>control | 1988-<br>2013 | US (CA)          | Overall<br>Acute<br>lymphoblas<br>tic<br>leukemia | 270,147/<br>11,149 |      | Birth<br>certificate<br>(maternal<br>weight at<br>delivery minus<br>pre-pregnancy<br>weight) | N/A<br>Cases: 50 (inadequate),<br>83 (appropriate), 112<br>(excessive)<br>Controls: 8,098                                                 | Californian<br>Cancer<br>Registry<br>(ICCC-3)                                          | N/A<br><br>Inadequate: 0.78<br>(0.55-1.11),<br>appropriate:                                                                                                                                   | Year of birth,<br>maternal/paternal<br>race/ethnicity,<br>maternal age                 |



|                              |                   |                                                                                                                                                                                                                                                                                                                                                                                                                                                                                                                                                                                                                                                                                                                                                                                                                                                                                            |                                                                                              |                                                                        |
|------------------------------|-------------------|--------------------------------------------------------------------------------------------------------------------------------------------------------------------------------------------------------------------------------------------------------------------------------------------------------------------------------------------------------------------------------------------------------------------------------------------------------------------------------------------------------------------------------------------------------------------------------------------------------------------------------------------------------------------------------------------------------------------------------------------------------------------------------------------------------------------------------------------------------------------------------------------|----------------------------------------------------------------------------------------------|------------------------------------------------------------------------|
|                              |                   | (inadequate), 10,698<br>(appropriate), 16,550<br>(excessive)<br>Cases: 35 (inadequate),<br>31 (appropriate), 50<br>(excessive)<br>Controls: 8,098<br>(inadequate), 10,698<br>(appropriate), 16,550<br>(excessive)<br>Cases: 94 (inadequate),<br>132 (appropriate), 177<br>(excessive)<br>Controls: 8,098<br>(inadequate), 10,698<br>(appropriate), 16,550<br>(excessive)<br>Cases: 22 (inadequate),<br>24 (appropriate), 59<br>(excessive)<br>Controls: 8,098<br>(inadequate), 10,698<br>(appropriate), 16,550<br>(excessive)<br>Cases: 21 (inadequate),<br>27 (appropriate), 28<br>(excessive)<br>Controls: 8,098<br>(inadequate), 10,698<br>(appropriate), 16,550<br>(excessive)<br>Cases: 18 (inadequate),<br>18 (appropriate), 29<br>(excessive)<br>Controls: 8,098<br>(inadequate), 10,698<br>(appropriate), 16,550<br>(excessive)<br>Cases: 13 (inadequate),<br>20 (appropriate), 37 | referent, excessive:<br>0.86 (0.65-1.14)                                                     |                                                                        |
| Acute<br>myeloid<br>leukemia | 270,147/<br>706   |                                                                                                                                                                                                                                                                                                                                                                                                                                                                                                                                                                                                                                                                                                                                                                                                                                                                                            | Inadequate: 1.50<br>(0.92-2.43),<br>appropriate:<br>referent, excessive:<br>1.05 (0.67-1.64) | Year of birth,<br>maternal/paternal<br>race/ethnicity,<br>maternal age |
| Leukemia                     | 270,147/<br>5,034 |                                                                                                                                                                                                                                                                                                                                                                                                                                                                                                                                                                                                                                                                                                                                                                                                                                                                                            | Inadequate: 0.93<br>(0.71-1.21),<br>appropriate:<br>referent, excessive:<br>0.86 (0.69-1.08) | Year of birth,<br>maternal/paternal<br>race/ethnicity,<br>maternal age |
| Astrocytom<br>a              | 270,147/<br>990   |                                                                                                                                                                                                                                                                                                                                                                                                                                                                                                                                                                                                                                                                                                                                                                                                                                                                                            | Inadequate: 1.28<br>(0.72-2.28),<br>appropriate:<br>referent, excessive:<br>1.56 (0.97-2.50) | Year of birth,<br>maternal/paternal<br>race/ethnicity,<br>maternal age |
| Embryonal                    | 270,147/<br>709   |                                                                                                                                                                                                                                                                                                                                                                                                                                                                                                                                                                                                                                                                                                                                                                                                                                                                                            | Inadequate: 1.05<br>(0.59-1.86),<br>appropriate:<br>referent, excessive:<br>0.66 (0.39-1.13) | Year of birth,<br>maternal/paternal<br>race/ethnicity,<br>maternal age |
| Germ cell                    | 270,147/<br>445   |                                                                                                                                                                                                                                                                                                                                                                                                                                                                                                                                                                                                                                                                                                                                                                                                                                                                                            | Inadequate: 1.31<br>(0.68-2.52),<br>appropriate:<br>referent, excessive:<br>1.07 (0.59-1.94) | Year of birth,<br>maternal/paternal<br>race/ethnicity,<br>maternal age |
| Hepatoblas<br>toma           | 270,147/<br>337   |                                                                                                                                                                                                                                                                                                                                                                                                                                                                                                                                                                                                                                                                                                                                                                                                                                                                                            | Inadequate: 0.85<br>(0.42-1.72),                                                             | Year of birth,<br>maternal/paternal                                    |



|                                                                                                                                                           |                                                                                        |                                                     |          |            |                       |     |                                                                                                                                                     |                                                                         |                                               |                                                                                                                                                                                                                      |                                                     |          |
|-----------------------------------------------------------------------------------------------------------------------------------------------------------|----------------------------------------------------------------------------------------|-----------------------------------------------------|----------|------------|-----------------------|-----|-----------------------------------------------------------------------------------------------------------------------------------------------------|-------------------------------------------------------------------------|-----------------------------------------------|----------------------------------------------------------------------------------------------------------------------------------------------------------------------------------------------------------------------|-----------------------------------------------------|----------|
| Stacy, et al.<br>2019 (9)                                                                                                                                 | Registry<br>based<br>prospective<br>cohort                                             | 2003-<br>2016                                       | US (PA)  | Any cancer | 1,812,13<br>1 (2,329) | <14 | Delivery<br>weight minus<br>pre-pregnancy<br>weight (pre-<br>pregnancy<br>weight<br>contained in<br>birth registry<br>[self-reported<br>by mother]) | Cases: 4 (inadequate),<br>10 (appropriate), 6<br>(excessive)            | Pennsylva<br>nia Cancer<br>Registry<br>(ICD3) | Inadequate: 0.6<br>(0.2-1.5),<br>appropriate:<br>referent, excessive:<br>0.7 (0.3-1.7)                                                                                                                               | Child's sex, child's<br>age, year of birth<br>group |          |
|                                                                                                                                                           |                                                                                        |                                                     |          |            |                       |     |                                                                                                                                                     | Controls: 334<br>(inadequate), 407<br>(appropriate), 372<br>(excessive) |                                               |                                                                                                                                                                                                                      |                                                     |          |
|                                                                                                                                                           |                                                                                        |                                                     |          |            |                       |     |                                                                                                                                                     | Ependyomo<br>mas                                                        |                                               |                                                                                                                                                                                                                      |                                                     | 1,113/20 |
|                                                                                                                                                           |                                                                                        |                                                     |          |            |                       |     |                                                                                                                                                     | Cases: 26 (inadequate),<br>31 (appropriate), 22<br>(excessive)          |                                               |                                                                                                                                                                                                                      |                                                     |          |
|                                                                                                                                                           |                                                                                        |                                                     |          |            |                       |     |                                                                                                                                                     | Controls: 334<br>(inadequate), 407<br>(appropriate), 372<br>(excessive) |                                               |                                                                                                                                                                                                                      |                                                     |          |
| Cases: 22 (inadequate),<br>31 (appropriate), 24<br>(excessive)                                                                                            | Inadequate: 1.0<br>(0.6-1.7),<br>appropriate:<br>referent, excessive:<br>0.8 (0.5-1.4) | Child's sex, child's<br>age, year of birth<br>group |          |            |                       |     |                                                                                                                                                     |                                                                         |                                               |                                                                                                                                                                                                                      |                                                     |          |
| Controls: 334<br>(inadequate), 407<br>(appropriate), 372<br>(excessive)                                                                                   |                                                                                        |                                                     |          |            |                       |     |                                                                                                                                                     |                                                                         |                                               |                                                                                                                                                                                                                      |                                                     |          |
| Astrocytom<br>as                                                                                                                                          |                                                                                        |                                                     | 1,113/79 |            |                       |     |                                                                                                                                                     |                                                                         |                                               |                                                                                                                                                                                                                      |                                                     |          |
| Cases: 25 (inadequate),<br>18 (appropriate), 11<br>(excessive)                                                                                            |                                                                                        |                                                     |          |            |                       |     |                                                                                                                                                     |                                                                         |                                               |                                                                                                                                                                                                                      |                                                     |          |
| Controls: 334<br>(inadequate), 407<br>(appropriate), 372<br>(excessive)                                                                                   |                                                                                        |                                                     |          |            |                       |     |                                                                                                                                                     |                                                                         |                                               |                                                                                                                                                                                                                      |                                                     |          |
| Cases: 216 (<5 kg), 314<br>(5-9 kg), 731 (10-14<br>kg), 647 (15-19 kg),<br>266 (20-24 kg), 93 (25-<br>29 kg), 62 (30+ kg)                                 | Inadequate: 0.9<br>(0.5-1.6),<br>appropriate:<br>referent, excessive:<br>0.8 (0.5-1.4) | Child's sex, child's<br>age, year of birth<br>group |          |            |                       |     |                                                                                                                                                     |                                                                         |                                               |                                                                                                                                                                                                                      |                                                     |          |
| Toal: 163,192 (<5 kg),<br>260,046 (5-9 kg),<br>588,353 (10-14 kg),<br>475,775 (15-19 kg),<br>202,800 (20-24 kg),<br>72,759 (25-29 kg),<br>49,206 (30+ kg) |                                                                                        |                                                     |          |            |                       |     |                                                                                                                                                     |                                                                         |                                               |                                                                                                                                                                                                                      |                                                     |          |
| Embryonal                                                                                                                                                 |                                                                                        |                                                     | 1,113/77 |            |                       |     |                                                                                                                                                     |                                                                         |                                               |                                                                                                                                                                                                                      |                                                     |          |
| Cases: 25 (inadequate),<br>18 (appropriate), 11<br>(excessive)                                                                                            |                                                                                        |                                                     |          |            |                       |     |                                                                                                                                                     |                                                                         |                                               |                                                                                                                                                                                                                      |                                                     |          |
| Controls: 334<br>(inadequate), 407<br>(appropriate), 372<br>(excessive)                                                                                   |                                                                                        |                                                     |          |            |                       |     |                                                                                                                                                     |                                                                         |                                               |                                                                                                                                                                                                                      |                                                     |          |
| Cases: 216 (<5 kg), 314<br>(5-9 kg), 731 (10-14<br>kg), 647 (15-19 kg),<br>266 (20-24 kg), 93 (25-<br>29 kg), 62 (30+ kg)                                 | Inadequate: 1.6<br>(0.9-3.0),<br>appropriate:<br>referent, excessive:<br>0.7 (0.3-1.5) | Child's sex, child's<br>age, year of birth<br>group |          |            |                       |     |                                                                                                                                                     |                                                                         |                                               |                                                                                                                                                                                                                      |                                                     |          |
| Toal: 163,192 (<5 kg),<br>260,046 (5-9 kg),<br>588,353 (10-14 kg),<br>475,775 (15-19 kg),<br>202,800 (20-24 kg),<br>72,759 (25-29 kg),<br>49,206 (30+ kg) |                                                                                        |                                                     |          |            |                       |     |                                                                                                                                                     |                                                                         |                                               |                                                                                                                                                                                                                      |                                                     |          |
| Other<br>Gliomas                                                                                                                                          |                                                                                        |                                                     | 1,113/54 |            |                       |     |                                                                                                                                                     |                                                                         |                                               |                                                                                                                                                                                                                      |                                                     |          |
| Cases: 216 (<5 kg), 314<br>(5-9 kg), 731 (10-14<br>kg), 647 (15-19 kg),<br>266 (20-24 kg), 93 (25-<br>29 kg), 62 (30+ kg)                                 |                                                                                        |                                                     |          |            |                       |     |                                                                                                                                                     |                                                                         |                                               |                                                                                                                                                                                                                      |                                                     |          |
| Toal: 163,192 (<5 kg),<br>260,046 (5-9 kg),<br>588,353 (10-14 kg),<br>475,775 (15-19 kg),<br>202,800 (20-24 kg),<br>72,759 (25-29 kg),<br>49,206 (30+ kg) |                                                                                        |                                                     |          |            |                       |     |                                                                                                                                                     |                                                                         |                                               |                                                                                                                                                                                                                      |                                                     |          |
|                                                                                                                                                           |                                                                                        |                                                     |          |            |                       |     |                                                                                                                                                     |                                                                         |                                               | <5 kg: referent, 5-9<br>kg: 0.91 (0.76-<br>1.08), 10-14 kg:<br>0.92 (0.79-1.06),<br>15-19 kg: 0.97<br>(0.83-1.13), 20-24<br>kg: 0.94 (0.79-<br>1.13), 25-29 kg:<br>0.92 (0.72-1.17),<br>30+ kg: 0.91 (0.68-<br>1.20) | Maternal age and/or<br>race/ethnicity               |          |

|                              |                     |                                                                                                                                                                                                                                                        |                                                                                                                                                                                     |                                    |
|------------------------------|---------------------|--------------------------------------------------------------------------------------------------------------------------------------------------------------------------------------------------------------------------------------------------------|-------------------------------------------------------------------------------------------------------------------------------------------------------------------------------------|------------------------------------|
|                              |                     | Cases: 82 (<5 kg), 105 (5-9 kg), 228 (10-14 kg), 198 (15-19 kg), 82 (20-24 kg), 30 (25-29 kg), 18 (30+ kg)<br>Total: 163,192 (<5 kg), 260,046 (5-9 kg), 588,353 (10-14 kg), 475,775 (15-19 kg), 202,800 (20-24 kg), 72,759 (25-29 kg), 49,206 (30+ kg) | <5 kg: referent, 5-9 kg: 0.80 (0.60-1.06), 10-14 kg: 0.75 (0.58-0.96), 15-19 kg: 0.78 (0.60-1.01), 20-24 kg: 0.76 (0.56-1.04), 25-29 kg: 0.78 (0.51-1.19), 30+ kg: 0.69 (0.42-1.16) | Maternal age and/or race/ethnicity |
| Leukemia                     | 1,812,13<br>1 (743) | Cases: 65 (<5 kg), 80 (5-9 kg), 176 (10-14 kg), 157 (15-19 kg), 65 (20-24 kg), 21 (25-29 kg), 17 (30+ kg)<br>Total: 163,192 (<5 kg), 260,046 (5-9 kg), 588,353 (10-14 kg), 475,775 (15-19 kg), 202,800 (20-24 kg), 72,759 (25-29 kg), 49,206 (30+ kg)  | <5 kg: referent, 5-9 kg: 0.76 (0.55-1.06), 10-14 kg: 0.73 (0.55-0.96), 15-19 kg: 0.77 (0.58-1.03), 20-24 kg: 0.76 (0.54-1.07), 25-29 kg: 0.69 (0.42-1.12), 30+ kg: 0.83 (0.48-1.41) | Maternal age and/or race/ethnicity |
| Acute lymphoblastic leukemia | 1,810,38<br>3 (581) | Cases: 22 (<5 kg), 28 (5-9 kg), 104 (10-14 kg), 85 (15-19 kg), 31 (20-24 kg), 13 (25-29 kg), 14 (30+ kg)<br>Total: 163,192 (<5 kg), 260,046 (5-9 kg), 588,353 (10-14 kg), 475,775 (15-19 kg),                                                          | <5 kg: referent, 5-9 kg: 0.79 (0.45-1.38), 10-14 kg: 1.28 (0.81-2.02), 15-19 kg: 1.27 (0.79-2.03), 20-24 kg: 1.10 (0.63-1.90), 25-29 kg: 1.29 (0.65-2.56),                          | Maternal age and/or race/ethnicity |
| Neuroblastoma                | 1,810,38<br>3 (297) |                                                                                                                                                                                                                                                        |                                                                                                                                                                                     |                                    |

202,800 (20-24 kg),  
72,759 (25-29 kg),  
49,206 (30+ kg)  
Total: 163,041 (<5 kg),  
259,812 (5-9 kg),  
587,798 (10-14 kg),  
475,285 (15-19 kg),  
202,599 (20-24 kg),  
72,687 (25-29 kg),  
49,161 (30+ kg)

30+ kg: 2.07 (1.06-  
4.04)

---

<sup>a</sup>BMI: body mass index, OR: odds ratio, CI: confidence intervals, ICD: International Classification of Diseases, kg: kilograms

Supplementary Table 4. Quality assessment of case-control/nested case-control studies in the meta-analysis according to the Newcastle-Ottawa scale (NOS)<sup>a</sup>

| Study                | Selection       |                         |                   |                    | Comparability                       | Exposure               |                               |                   | Overall Score / Quality |
|----------------------|-----------------|-------------------------|-------------------|--------------------|-------------------------------------|------------------------|-------------------------------|-------------------|-------------------------|
|                      | Case definition | Case representativeness | Control selection | Control definition | Comparability of cases and controls | Exposure ascertainment | Same method for cases/control | Non-response rate |                         |
| Cnattingius 1995     | *               | *                       | *                 | *                  | *                                   | *                      | *                             | *                 | 8 / high                |
| Petridou 1997        | *               | *                       | 0                 | *                  | **                                  | 0                      | *                             | *                 | 7 / high                |
| Hamrick 2001         | *               | *                       | *                 | *                  | *                                   | 0                      | *                             | *                 | 7 / high                |
| Åberg 2001           | *               | *                       | *                 | *                  | *                                   | 0                      | *                             | *                 | 7 / high                |
| Westbom 2002         | 0               | *                       | 0                 | 0                  | *                                   | *                      | *                             | *                 | 5 / moderate            |
| Podvin 2006          | *               | *                       | *                 | *                  | *                                   | *                      | *                             | *                 | 8 / high                |
| Spector 2007         | *               | *                       | *                 | *                  | *                                   | 0                      | *                             | *                 | 7 / high                |
| Chow 2007            | *               | *                       | *                 | *                  | *                                   | *                      | *                             | *                 | 8 / high                |
| Daniels 2008         | *               | *                       | *                 | *                  | *                                   | 0                      | *                             | *                 | 7 / high                |
| Ognjanovic 2009      | *               | 0                       | *                 | *                  | *                                   | 0                      | *                             | *                 | 6 / moderate            |
| Heck 2012            | *               | *                       | *                 | *                  | *                                   | *                      | *                             | *                 | 8 / high                |
| Musselman 2013       | *               | *                       | *                 | *                  | *                                   | 0                      | *                             | *                 | 7 / high                |
| Greenop 2014         | *               | *                       | *                 | *                  | *                                   | 0                      | *                             | 0                 | 6 / moderate            |
| Heck 2015            | *               | *                       | *                 | *                  | *                                   | 0                      | *                             | *                 | 7 / high                |
| Contreras 2016       | *               | *                       | *                 | *                  | *                                   | *                      | *                             | 0                 | 7 / high                |
| Peckham-Gregory 2016 | *               | *                       | *                 | *                  | 0                                   | *                      | *                             | *                 | 7 / high                |
| Vienneau 2016        | *               | *                       | *                 | *                  | *                                   | 0                      | 0                             | *                 | 6 / moderate            |
| Bailey 2017          | *               | *                       | *                 | *                  | *                                   | *                      | *                             | 0                 | 7 / high                |
| Seppälä 2020         | *               | *                       | *                 | *                  | *                                   | *                      | *                             | *                 | 8 / high                |
| Bauer 2020           | 0               | *                       | *                 | *                  | *                                   | 0                      | *                             | *                 | 6 / moderate            |

<sup>a</sup>For NOS assessment, maximum of one star (\*) can be given for selection, exposure, and outcome categories. Maximum of two stars (\*\*\*) can be given for comparability category. Scores of 7-9 were considered high quality, scores of 4-6 considered moderate quality, scores of 1-3 were considered poor quality

| Supplementary Table 5. Quality assessment of cohort/case-cohort studies in the meta-analysis according to the Newcastle-Ottawa scale (NOS) <sup>a</sup> |                           |                          |                        |                              |                                                     |                    |                               |                               |                         |
|---------------------------------------------------------------------------------------------------------------------------------------------------------|---------------------------|--------------------------|------------------------|------------------------------|-----------------------------------------------------|--------------------|-------------------------------|-------------------------------|-------------------------|
| Study                                                                                                                                                   | Selection                 |                          |                        |                              | Comparability                                       | Outcome            |                               |                               | Overall Score / Quality |
|                                                                                                                                                         | Cohort representativeness | Selection of non-exposed | Exposure ascertainment | Outcome not present at start | Cohort comparability on basis of design or analysis | Outcome assessment | Sufficient time for follow-up | Adequacy of follow-up cohorts |                         |
| McLaughlin 2006(1)                                                                                                                                      | *                         | *                        | *                      | *                            | *                                                   | *                  | 0                             | *                             | 7 / high                |
| McLaughlin 2006(2)                                                                                                                                      | *                         | *                        | *                      | *                            | *                                                   | *                  | 0                             | *                             | 7 / high                |
| Milne 2007                                                                                                                                              | *                         | *                        | *                      | *                            | 0                                                   | *                  | *                             | *                             | 7 / high                |
| Puumala 2007                                                                                                                                            | *                         | *                        | *                      | *                            | *                                                   | *                  | *                             | *                             | 8 / high                |
| Johnson 2008                                                                                                                                            | *                         | 0                        | *                      | *                            | *                                                   | *                  | *                             | *                             | 7 / high                |
| McLaughlin 2009                                                                                                                                         | *                         | *                        | *                      | *                            | *                                                   | *                  | 0                             | *                             | 7 / high                |
| Wu 2012                                                                                                                                                 | *                         | *                        | *                      | *                            | **                                                  | *                  | *                             | *                             | 9 / high                |
| Petridou 2015                                                                                                                                           | *                         | *                        | *                      | *                            | *                                                   | *                  | *                             | *                             | 8 / high                |
| Deleskog 2017                                                                                                                                           | *                         | *                        | *                      | *                            | **                                                  | *                  | *                             | *                             | 9 / high                |
| Søgaard 2018                                                                                                                                            | *                         | 0                        | *                      | *                            | *                                                   | *                  | *                             | *                             | 7 / high                |
| Kessous 2019                                                                                                                                            | *                         | *                        | *                      | *                            | *                                                   | *                  | *                             | *                             | 8 / high                |
| Borsari 2019                                                                                                                                            | *                         | *                        | *                      | *                            | *                                                   | *                  | *                             | *                             | 8 / high                |
| Stacy 2019                                                                                                                                              | *                         | *                        | *                      | *                            | *                                                   | *                  | *                             | *                             | 8 / high                |

<sup>a</sup>For NOS assessment, maximum of one star (\*) can be given for selection, exposure, and outcome categories. Maximum of two stars (\*\*) can be given for comparability category. Scores of 7-9 were considered high quality, scores of 4-6 considered moderate quality, scores of 1-3 were considered poor quality.

Supplementary Table 6. Subgroup analyses for the associations with childhood cancer risk according to geographic region and study design

| Subgroup                                      | No. of Studies | Summary OR (95% CI) | Heterogeneity      |                |
|-----------------------------------------------|----------------|---------------------|--------------------|----------------|
|                                               |                |                     | I <sup>2</sup> , % | P <sup>a</sup> |
| <b>Region</b>                                 |                |                     |                    |                |
| Any cancer/pre-pregnancy BMI (5-unit)         |                |                     |                    |                |
| Total                                         | 9              | 1.02 (0.97-1.07)    | 41.5               | 0.03           |
| North America                                 | 6              | 1.02 (0.97-1.08)    | 39.0               | 0.05           |
| Other <sup>b</sup>                            | 3              | 1.00 (0.87-1.14)    | 53.6               | 0.09           |
| Any cancer/pregestational diabetes            |                |                     |                    |                |
| Total                                         | 11             | 1.19 (1.02-1.37)    | 28.8               | 0.11           |
| North America                                 | 4              | 1.07 (0.92-1.25)    | 9.8                | 0.35           |
| Other <sup>c</sup>                            | 7              | 1.50 (1.18-1.91)    | 23.3               | 0.24           |
| Any cancer/gestational diabetes               |                |                     |                    |                |
| Total                                         | 15             | 1.20 (1.09-1.33)    | 0.0                | 0.65           |
| North America                                 | 7              | 1.26 (1.05-1.51)    | 0.0                | 0.82           |
| Other <sup>d</sup>                            | 8              | 1.14 (0.96-1.35)    | 22.1               | 0.25           |
| Any cancer/any diabetes                       |                |                     |                    |                |
| Total                                         | 25             | 1.20 (1.12-1.29)    | 1.7                | 0.44           |
| North America                                 | 11             | 1.14 (1.03-1.27)    | 0.0                | 0.70           |
| Other <sup>e</sup>                            | 14             | 1.30 (1.14-1.48)    | 20.4               | 0.21           |
| ALL/gestational diabetes                      |                |                     |                    |                |
| Total                                         | 6              | 1.40 (1.12-1.75)    | 0.0                | 0.81           |
| North America                                 | 3              | 1.29 (0.95-1.75)    | 0.0                | 0.64           |
| Other <sup>b</sup>                            | 3              | 1.55 (1.11-2.14)    | 0.0                | 0.70           |
| ALL/any diabetes                              |                |                     |                    |                |
| Total                                         | 9              | 1.46 (1.28-1.67)    | 0.0                | 0.59           |
| North America                                 | 4              | 1.32 (1.12-1.56)    | 0.0                | 0.81           |
| Other <sup>f</sup>                            | 5              | 1.75 (1.39-2.19)    | 0.0                | 0.69           |
| Any leukemia/gestational diabetes             |                |                     |                    |                |
| Total                                         | 7              | 1.32 (1.08-1.61)    | 0.0                | 0.60           |
| North America                                 | 3              | 1.15 (0.84-1.58)    | 16.9               | 0.31           |
| Other <sup>g</sup>                            | 4              | 1.52 (1.12-2.05)    | 0.0                | 0.87           |
| Any leukemia/any diabetes                     |                |                     |                    |                |
| Total                                         | 11             | 1.34 (1.19-1.51)    | 0.0                | 0.53           |
| North America                                 | 5              | 1.22 (1.05-1.41)    | 0.0                | 0.68           |
| Other <sup>h</sup>                            | 6              | 1.63 (1.32-2.02)    | 0.0                | 0.74           |
| <b>Design</b>                                 |                |                     |                    |                |
| Any cancer/pregestational diabetes            |                |                     |                    |                |
| Total                                         | 11             | 1.19 (1.02-1.37)    | 28.8               | 0.11           |
| Case-control                                  | 6              | 1.11 (0.96-1.28)    | 14.2               | 0.30           |
| Cohort                                        | 5              | 1.67 (1.17-2.38)    | 28.8               | 0.22           |
| Any cancer/gestational diabetes               |                |                     |                    |                |
| Total                                         | 15             | 1.20 (1.09-1.33)    | 0.0                | 0.65           |
| Case-control                                  | 9              | 1.25 (1.11-1.41)    | 0.0                | 0.89           |
| Cohort/case-cohort <sup>i</sup>               | 6              | 1.11 (0.86-1.43)    | 26.2               | 0.22           |
| Any cancer/any diabetes                       |                |                     |                    |                |
| Total                                         | 25             | 1.20 (1.12-1.29)    | 1.7                | 0.44           |
| Case-control/nested case-control <sup>j</sup> | 17             | 1.20 (1.11-1.31)    | 0.0                | 0.58           |



|                                               |    |                  |      |      |
|-----------------------------------------------|----|------------------|------|------|
| Cohort/case-cohort <sup>k</sup>               | 8  | 1.30 (1.07-1.57) | 29.5 | 0.17 |
| ALL/any diabetes                              |    |                  |      |      |
| Total                                         | 9  | 1.46 (1.28-1.67) | 0.0  | 0.59 |
| Case-control/nested case-control <sup>l</sup> | 3  | 1.34 (1.12-1.62) | 0.0  | 0.66 |
| Cohort/case-cohort <sup>m</sup>               | 6  | 1.60 (1.32-1.95) | 0.0  | 0.52 |
| Any leukemia/gestational diabetes             |    |                  |      |      |
| Total                                         | 7  | 1.32 (1.08-1.61) | 0.0  | 0.60 |
| Case-control                                  | 3  | 1.11 (0.78-1.57) | 0.0  | 0.52 |
| Cohort/case-cohort <sup>n</sup>               | 4  | 1.44 (1.12-1.85) | 0.0  | 0.59 |
| Any leukemia/any diabetes                     |    |                  |      |      |
| Total                                         | 11 | 1.34 (1.19-1.51) | 0.0  | 0.53 |
| Case-control/nested case-control <sup>o</sup> | 5  | 1.23 (1.05-1.45) | 0.0  | 0.76 |
| Cohort/case-cohort <sup>m</sup>               | 6  | 1.50 (1.23-1.83) | 2.7  | 0.41 |

<sup>a</sup>Random effects models were used for statistical analyses. All tests were 2-sided. Abbreviations – ALL: acute lymphoblastic leukemia; OR: odds ratio; CI: confidence intervals

<sup>b</sup>n=2 studies from Europe, n=1 study from Australia

<sup>c</sup>All studies from Europe

<sup>d</sup>n=6 studies from Europe, n=1 study from Australia, n=1 study from Israel

<sup>e</sup>n=12 studies from Europe, n=1 study from Australia, n=1 study from Israel

<sup>f</sup>n=4 studies from Europe, n=1 study from Australia

<sup>g</sup>n=3 studies from Europe, n=1 study from Australia

<sup>h</sup>n=5 studies from Europe, n=1 study from Australia

<sup>i</sup>n=5 cohort studies, n=1 case-cohort study

<sup>j</sup>n=16 case-control studies, n=1 nested case-control study

<sup>k</sup>n=6 cohort studies, n=2 case-cohort studies

<sup>l</sup>n=2 case-control studies, n=1 nested case-control study

<sup>m</sup>n=4 cohort studies, n=2 case-cohort studies

<sup>n</sup>n=3 cohort studies, n=1 case-cohort study

<sup>o</sup>n=4 case-control studies, n=1 nested case-control

Supplementary Figure 1. Forest plot: meta-analysis of the association between any diabetes and risk of any cancer. The error bars represent the 95% confidence intervals (CIs).

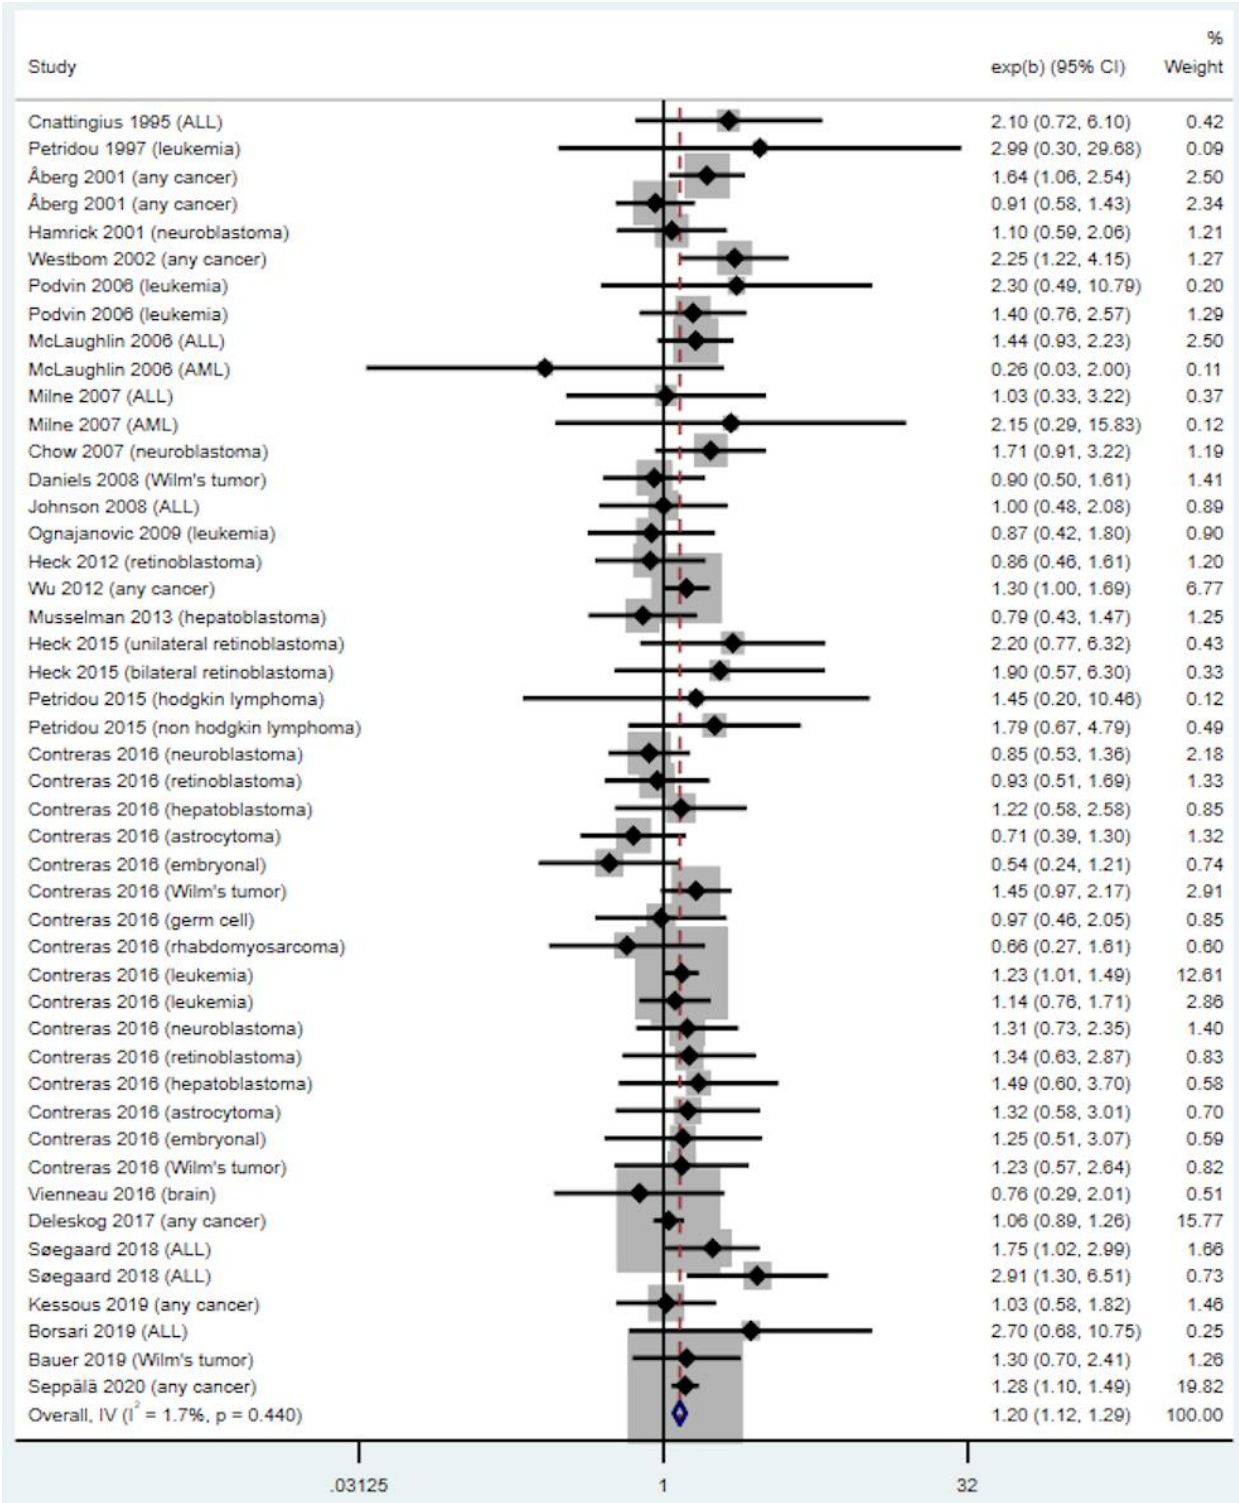

Supplementary Figure 2. Forest plot: meta-analysis of the association between any diabetes and risk of (A) any leukemia and (B) acute lymphoblastic leukemia among studies controlling for birthweight. The error bars represent the 95% confidence intervals (CIs).

A

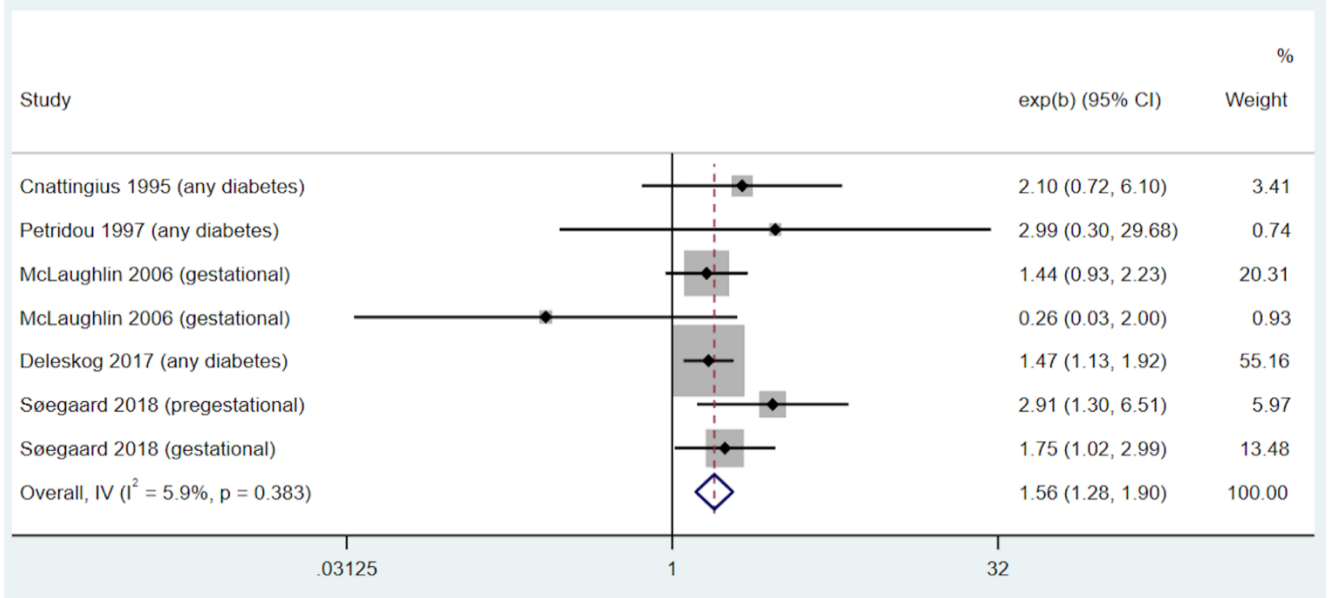

B

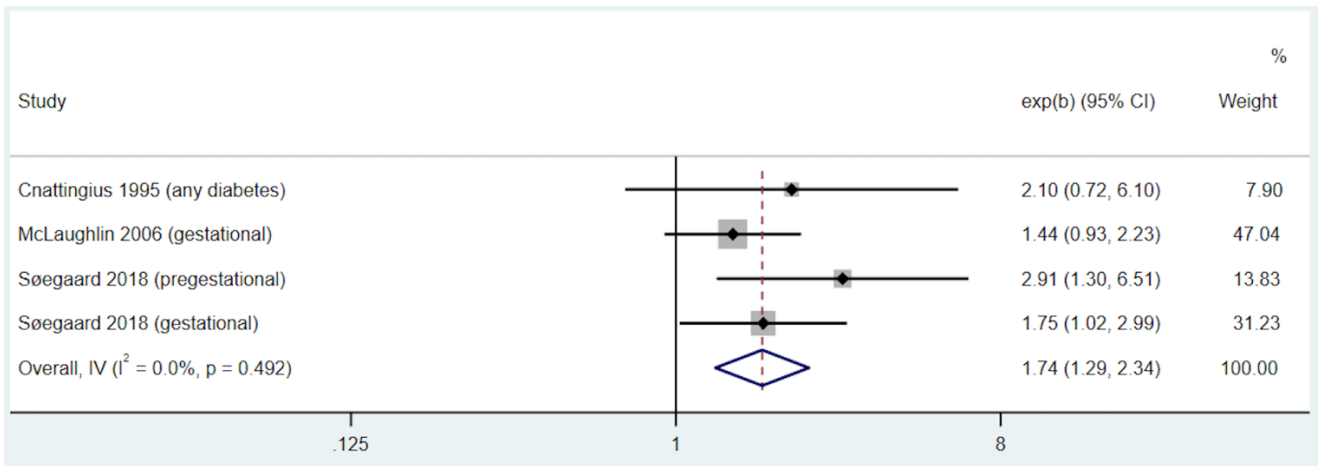

Supplementary Figure 3. Forest plot: meta-analysis of the association between (A) pregestational diabetes and (B) gestational diabetes and risk of any cancer. The error bars represent the 95% confidence intervals (CIs).

A

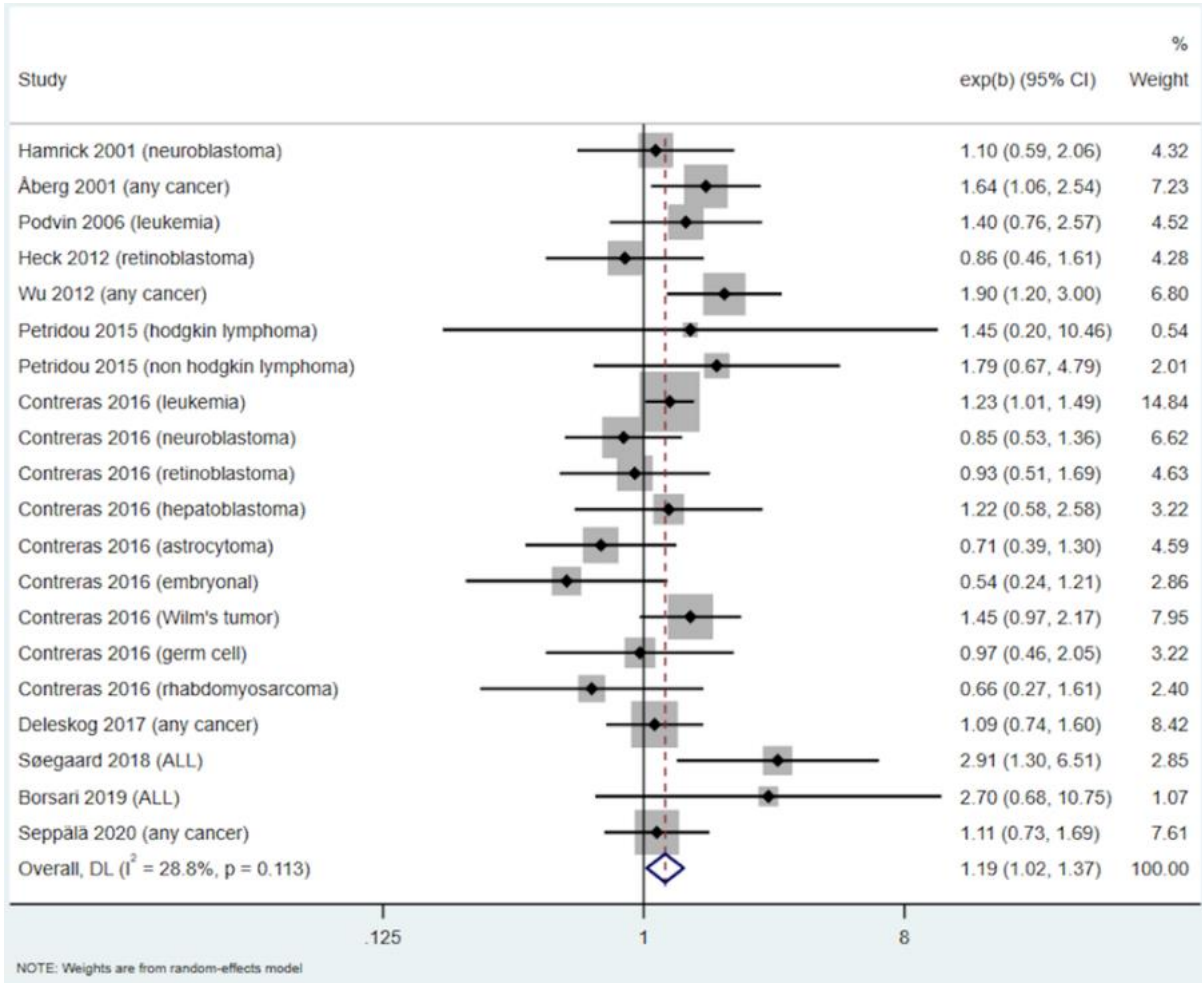

B

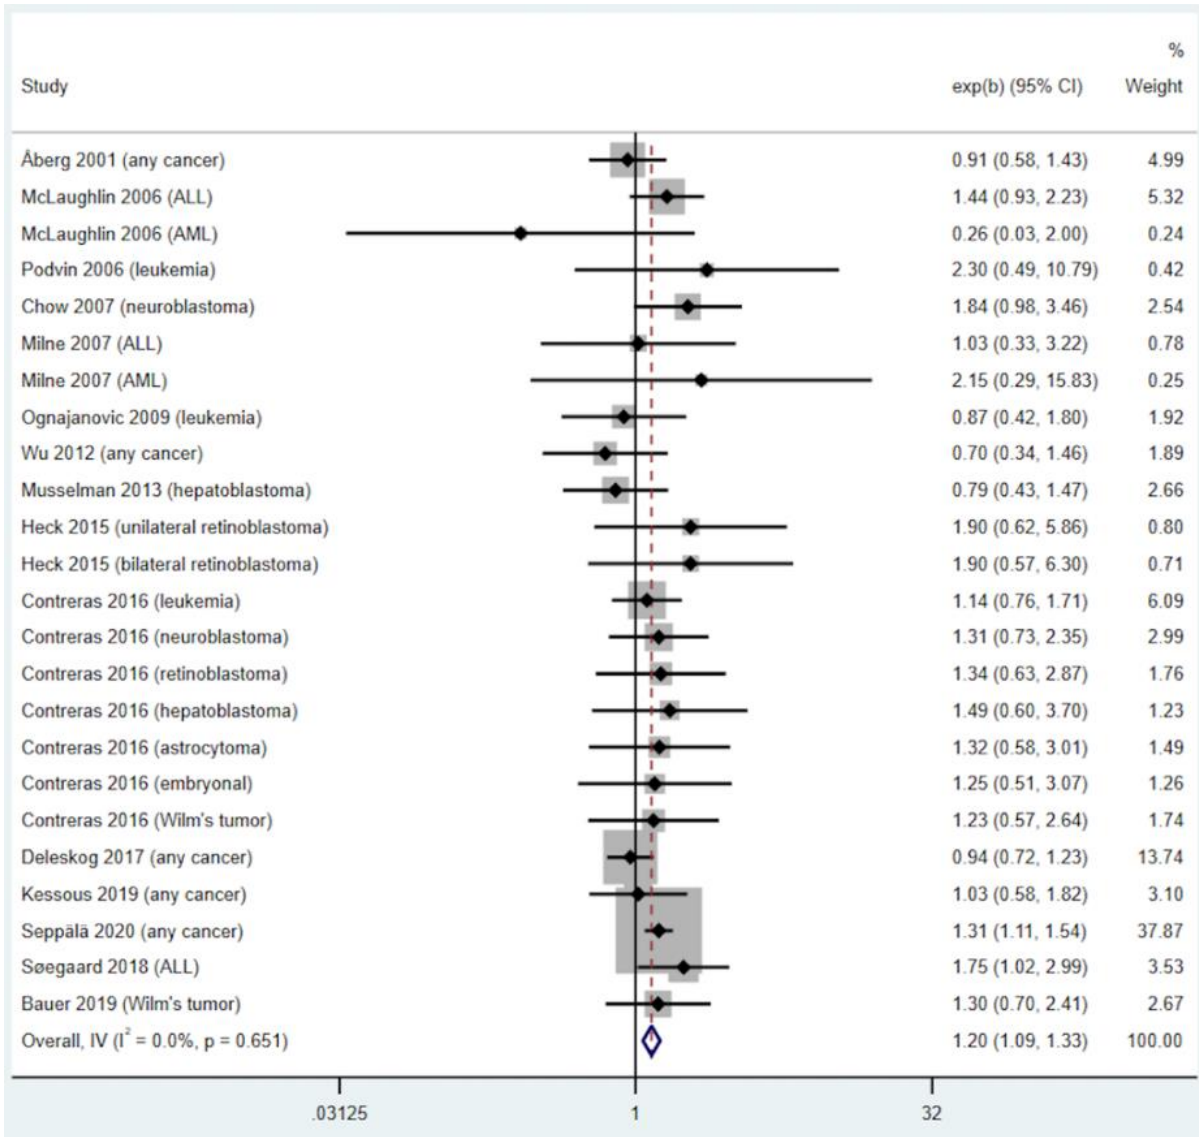

## References

1. McLaughlin CC, Baptiste MS, Schymura MJ, Nasca PC, Zdeb MS. Maternal and infant birth characteristics and hepatoblastoma. *Am J Epidemiol*. 2006;163(9):818-28.
2. Spector LG, Davies SM, Robison LL, Hilden JM, Roesler M, Ross JA. Birth characteristics, maternal reproductive history, and the risk of infant leukemia: a report from the Children's Oncology Group. *Cancer Epidemiol Biomarkers Prev*. 2007;16(1):128-34.
3. Greenop KR, Blair EM, Bower C, Armstrong BK, Milne E. Factors relating to pregnancy and birth and the risk of childhood brain tumors: Results from an Australian case-control study. *Pediatr Blood Cancer*. 2014;61(3):493-8.
4. Heck JE, Omidakhsh N, Azary S, Ritz B, von Ehrenstein OS, Bunin GR, et al. A case-control study of sporadic retinoblastoma in relation to maternal health conditions and reproductive factors: a report from the Children's Oncology group. *BMC Cancer*. 2015;15(1):1-10.
5. Petridou ET, Sergentanis TN, Skalkidou A, Antonopoulos CN, Dessypris N, Svensson T, et al. Maternal and birth anthropometric characteristics in relation to the risk of childhood lymphomas: a Swedish nationwide cohort study. *Eur J Cancer Prev*. 2015;24(6):535-41.
6. Contreras ZA, Ritz B, Virk J, Cockburn M, Heck JE. Maternal pre-pregnancy and gestational diabetes, obesity, gestational weight gain, and risk of cancer in young children: a population-based study in California. *Cancer Causes Control*. 2016;27(10):1273-85.
7. Peckham-Gregory EC, Danysh HE, Brown AL, Eckstein O, Grimes A, Chakraborty R, et al. Evaluation of maternal and perinatal characteristics on childhood lymphoma risk: A population-based case-control study. *Pediatr Blood Cancer*. 2017;64(5):e26321.
8. Bailey HD, Rios P, Lacour B, Guerrini-Rousseau L, Bertozzi AI, Leblond P, et al. Factors related to pregnancy and birth and the risk of childhood brain tumours: The ESTELLE and ESCALE studies (SFCE, France). *Int J Cancer*. 2017;140(8):1757-69.
9. Stacy SL, Buchanich JM, Ma Z-q, Mair C, Robertson L, Sharma RK, et al. Maternal obesity, birth size, and risk of childhood cancer development. *Am J Epidemiol*. 2019;188(8):1503-11.
10. Cnattingius S, Zack MM, Ekblom A, Gunnarskog J, Kreuger A, Linet M, et al. Prenatal and neonatal risk factors for childhood lymphatic leukemia. *JNCI*. 1995;87(12):908-14.
11. Petridou E, Trichopoulos D, Kalapothaki V, Pourtsidis A, Kogevinas M, Kalmanti M, et al. The risk profile of childhood leukaemia in Greece: a nationwide case-control study. *Br J Cancer*. 1997;76(9):1241-7.
12. Hamrick SE, Olshan AF, Neglia JP, Pollock BH. Association of pregnancy history and birth characteristics with neuroblastoma: a report from the Children's Cancer Group and the Pediatric Oncology Group. *Paediatr Perinat Epidemiol*. 2001;15(4):328-37.
13. Westbom L, Åberg A, Källén B. Childhood malignancy and maternal diabetes or other auto-immune disease during pregnancy. *Br J Cancer*. 2002;86(7):1078-80.
14. Podvin D, Kuehn CM, Mueller BA, Williams M. Maternal and birth characteristics in relation to childhood leukaemia. *Paediatr Perinat Epidemiol*. 2006;20(4):312-22.
15. McLaughlin C, Baptiste M, Schymura M, Nasca P, Zdeb M. Birth weight, maternal weight and childhood leukaemia. *Br J Cancer*. 2006;94(11):1738-44.
16. Chow EJ, Friedman DL, Mueller BA. Maternal and perinatal characteristics in relation to neuroblastoma. *Cancer*. 2007;109(5):983-92.

17. Milne E, Laurvick CL, Blair E, Bower C, De Klerk N. Fetal growth and acute childhood leukemia: looking beyond birth weight. *Am J Epidemiol.* 2007;166(2):151-9.
18. Daniels JL, Pan I-J, Olshan AF, Breslow NE, Bunin GR, Ross JA. Obstetric history and birth characteristics and Wilms tumor: a report from the Children's Oncology Group. *Cancer Causes Control.* 2008;19(10):1103-10.
19. Johnson KJ, Soler JT, Puumala SE, Ross JA, Spector LG. Parental and infant characteristics and childhood leukemia in Minnesota. *BMC Pediatr.* 2008;8(1):1-10.
20. Ognjanovic S, Puumala S, Spector LG, Smith FO, Robison LL, Olshan AF, et al. Maternal health conditions during pregnancy and acute leukemia in children with Down syndrome: A Children's Oncology Group study. *Pediatr Blood Cancer.* 2009;52(5):602-8.
21. Heck JE, Lombardi CA, Meyers TJ, Cockburn M, Wilhelm M, Ritz B. Perinatal characteristics and retinoblastoma. *Cancer Causes Control.* 2012;23(9):1567-75.
22. Wu CS, Nohr EA, Bech BH, Vestergaard M, Olsen J. Long-term health outcomes in children born to mothers with diabetes: a population-based cohort study. *PLoS One.* 2012;7(5):e36727.
23. Musselman JR, Georgieff MK, Ross JA, Tomlinson GE, Feusner J, Krailo M, et al. Maternal pregnancy events and exposures and risk of hepatoblastoma: a Children's Oncology Group (COG) study. *Cancer Epidemiol.* 2013;37(3):318-20.
24. Vienneau D, Infanger D, Feychting M, Schüz J, Schmidt LS, Poulsen AH, et al. A multinational case-control study on childhood brain tumours, anthropogenic factors, birth characteristics and prenatal exposures: a validation of interview data. *Cancer Epidemiol.* 2016;40:52-9.
25. Deleskog A, den Hoed M, Tettamanti G, Carlsson S, Ljung R, Feychting M, et al. Maternal diabetes and incidence of childhood cancer—a nationwide cohort study and exploratory genetic analysis. *Clin Epidemiol.* 2017;9:633.
26. Søgaard SH, Rostgaard K, Kamper-Jørgensen M, Schmiegelow K, Hjalgrim H. Maternal diabetes and risk of childhood acute lymphoblastic leukaemia in the offspring. *Br J Cancer.* 2018;118(1):117-20.
27. Borsari L, Malagoli C, Della Torre F, Cellini M, Rodolfi R, Pession A, et al. Maternal pregestational diabetes and risk of acute lymphoblastic leukemia in the offspring: A population-based study in Northern Italy. *Cancer Epidemiol.* 2019;62:101572.
28. Bauer H, Rios P, Schleiermacher G, Valteau-Couanet D, Bertozzi A-I, Thebaud E, et al. Maternal and perinatal characteristics, congenital malformations and the risk of wilms tumor: the ESTELLE study. *Cancer Causes Control.* 2020:1-11.
29. Kessous R, Wainstock T, Walfisch A, Sheiner E. The risk for childhood malignancies in the offspring of mothers with previous gestational diabetes mellitus: a population-based cohort study. *Eur J Cancer Prev.* 2019;28(4):377-81.
30. Seppälä LK, Vetteranta K, Pitkäniemi J, Hirvonen E, Leinonen MK, Madanat-Harjuoja LM. Maternal diabetes and risk of childhood cancer in the offspring. *Int J Cancer.* 2020;147(3):662-8.
31. Puumala SE, Soler JT, Johnson KJ, Spector LG. Birth characteristics and Wilms tumor in Minnesota. *Int J Cancer.* 2008;122(6):1368-73.
32. McLaughlin CC, Baptiste MS, Schymura MJ, Zdeb MS, Nasca PC. Perinatal risk factors for neuroblastoma. *Cancer Causes Control.* 2009;20(3):289-301.
